# Supplementary material for: Functional genomics reveal gene regulatory mechanisms underlying schizophrenia risk
Source: PubMed Central journal article supplement (PMC6368563; doi:10.1038/s41467-019-08666-4), 2019-02-08
Supplement: 41467_2019_8666_MOESM1_ESM.pdf [file 41467_2019_8666_MOESM1_ESM.pdf]

## **Functional genomics reveal gene regulatory mechanisms underlying schizophrenia risk**

Yongxia Huo<sup>1,4</sup>, Shiwu Li<sup>1,2,4</sup>, Jiewei Liu<sup>1</sup>, Xiaoyan Li<sup>1,2</sup> & Xiong-Jian Luo<sup>1,2,3,\*</sup>

<sup>1</sup>Key Laboratory of Animal Models and Human Disease Mechanisms of the Chinese Academy of Sciences & Yunnan Province, Kunming Institute of Zoology, Chinese Academy of Sciences, Kunming, Yunnan 650223, China

<sup>2</sup>Kunming College of Life Science, University of Chinese Academy of Sciences, Kunming, Yunnan 650204, China

<sup>3</sup>Center for Excellence in Animal Evolution and Genetics, Chinese Academy of Sciences, Kunming 650223, China

<sup>4</sup>These authors contributed equally to this work

\*To whom correspondence should be addressed; Key Laboratory of Animal Models and Human Disease Mechanisms, Kunming Institute of Zoology, Chinese Academy of Sciences, Kunming, Yunnan 650223, China; Tel: +86-871-68125413, Fax: +86-871-68125413, E-mail: [luoxiongjian@mail.kiz.ac.cn](mailto:luoxiongjian@mail.kiz.ac.cn).

## Supplementary Discussion

We noticed that the overlapping functional SNPs identified by functional annotation and functional genomics were limited. Following reasons may account for the limited overlapping: First, functional annotation and functional genomics use different strategies and principles to prioritize the potential functional SNPs. For example, sequence conservation plays a pivotal role in functional annotation approaches (including LINSIGHT, Eigen and CADD). However, functional genomics only use Chip-Seq data from human brain tissues or neuronal cells to derive the DNA binding motifs of TFs. Second, though Chip-Seq data were included in some functional annotation methods (including LINSIGHT, Eigen, GWAVA and RegulomeDB), the majority of Chip-Seq data were not from brain tissues (or neuronal cells). Considering the strong tissue specificity of regulatory elements, Chip-Seq and eQTL data from brain tissues were more proper for identifying the potential functional SNPs and target genes. Third, it should be noted that the results of functional annotation approaches were largely based on prediction (that is, these annotation methods predict the possible functional SNPs based on several features, including sequence conservation, location in Chip-Seq peak, association with gene expression, and etc). Finally, even if the potential functional SNP prioritized by the functional annotation methods have functional consequences, the exact gene regulatory mechanisms (e.g., binding of which transcription factor was disrupted by the potential functional SNPs) of these potential functional SNPs remain unknown. Thus, we mainly focused on functional genomics in this study.

The significant enrichment of nervous system development-related genes among the target genes of the TF binding-disrupting SNPs provides further support for the neurodevelopmental hypothesis of schizophrenia<sup>1-3</sup>. Despite genetic study has achieved significant progress in recent

years, the pathophysiology of schizophrenia remains largely unknown. Accumulating evidence suggests that schizophrenia may be originated from abnormal brain development. Consistently, several studies have shown that some schizophrenia risk genes have a pivotal role in neurogenesis and brain development<sup>4,5</sup>. In fact, previous studies have showed that schizophrenia risk genes were enriched in neurodevelopmental and cell adhesion pathways<sup>6-10</sup>. For example, through integrating chromatin contacts with SNP associations from schizophrenia GWAS, Won *et al.* showed that schizophrenia candidate genes were enriched in neurodevelopment pathway (including transcription factors involved in neurogenesis, neuronal differentiation and chromatin remodelers)<sup>9</sup>. In addition to the neurodevelopment and cell adhesion pathways, ion channel pathways were also reported to be enriched in schizophrenia<sup>11,12</sup>.

We found that the expression level of the target genes was higher in prenatal stage compared with postnatal stage, which was consistent with the findings of previous studies<sup>10,13,14</sup>. However, Pers *et al.* showed that schizophrenia risk genes prioritized by DEPICT approach have higher expression level in postnatal period<sup>12</sup>. This inconsistency may be due to the different prioritization methods used (i.e., Pers *et al.* used DEPICT to prioritize the schizophrenia risk genes, while we used functional genomics). More work is needed to validate if schizophrenia risk genes have higher expression level during prenatal stage.

We noticed that CTCF binding was frequently disrupted by the schizophrenia risk SNPs, suggesting that disruption of CTCF binding may represent a common mechanism that schizophrenia risk SNPs exert their effect on schizophrenia. CTCF is a transcriptional repressor encoded by *CTCF* gene, which has pivotal roles in transcription regulation<sup>15</sup>. Recent studies also showed that CTCF plays an important role in regulating the 3D structure of chromatin<sup>16,17</sup>. To

further explore the potential role of *CTCF* in schizophrenia, we performed eQTL annotation and identified 213 SNPs that showed significant association with *CTCF* expression in GTEx data set (nucleus accumbens (basal ganglia)) (**Supplementary Data 7**). Among the 213 SNPs, rs75760574 showed the most significant association with *CTCF* expression. We thus examined the association between rs75760574 and schizophrenia in PGC2+CLOZUK data set (40,675 cases and 64,643 controls). We found that rs75760574 showed marginal significant association with schizophrenia ( $P=0.002$ ). Of note, a recent study showed that *CTCF* is a novel risk gene for schizophrenia<sup>18</sup>. Interestingly, Baruch *et al.* also found that SNPs in CTCF binding regions were associated with schizophrenia in the Jewish Ashkenazi population<sup>19</sup>. These results provide convergent evidence that support the potential role of *CTCF* gene in schizophrenia. However, more work is need to elucidate the role of CTCF in schizophrenia.

Binding of CTCF and POLR2A were frequently disrupted by schizophrenia risk SNPs. This may be due to the possibility that CTCF and POLR2A have more binding sites (on the genome) than other TFs. To test if disruption of CTCF and POLR2A were random, we conducted additional analyses. We first identified 8,447 SNPs that disrupted binding of 30 TFs (these 30 TFs were used in this study) through mapping a total of 968,903 SNPs (from the Illumina HumanOmni1-Quad) to the identified CHIP-Seq peaks (the identification of TF binding-disrupting SNPs was described in more detail above). We then randomly sampled 132 SNPs (the number of SNPs equals to the identified TF binding-disrupting SNPs in this study) from the 8,447 TF binding-disrupting SNPs and counted the number of the SNPs that disrupted the binding of each TF. We found that the number of POLR2A binding-disrupting SNPs observed in this study were significantly higher than random SNPs ( $P=0.013$ , 1,000 simulations, **Supplementary Figure 10a**), suggesting that the

frequent disruption of POLR2A binding by schizophrenia risk SNPs may not due to random effect. However, the number of CTCF binding-disrupting SNPs (observed in this study) were not significantly different from random SNPs ( $P>0.05$ , 1,000 simulations, **Supplementary Figure 10b**), implying that the frequent disruption of CTCF by schizophrenia risk SNPs may due to random effect. We also compared the number of motifs (appear on the genome) of the 30 TFs through counting the identified ChIP-Seq peaks of each TF. We found that RAD21, EP300 and POLR2A have the largest number of ChIP-Seq peaks on the genome (**Supplementary Figure 10c**). In addition, the number of ChIP-Seq peaks of CTCF were also larger than many other TFs (including GATA3, REST, TAF1 and YY1). These results suggest that schizophrenia risk SNPs tend to disrupt POLR2A binding (but not CTCF). However, more work is need to further verify this.

**Supplementary Table 1. The most possible functional SNPs identified by different annotation approaches (credible causal SNPs were from the study of Pardinas *et al*<sup>20</sup>.)**

| Index SNP   | (or | CADD <sup>a</sup>         | Eigen <sup>b</sup>        | GWAVA <sup>c</sup>       | LINSIGHT <sup>d</sup>    | RegulomeDB <sup>e</sup> |
|-------------|-----|---------------------------|---------------------------|--------------------------|--------------------------|-------------------------|
| rs10148671  |     | <b>rs10148671(7.743)</b>  | <b>rs10148671(0.082)</b>  | <b>rs10148671(0.3)</b>   | <b>rs10148671(0.04)</b>  | <b>rs10148671(6)</b>    |
| rs1042992   |     | rs13266943(8.405)         | rs17310286(0.621)         | rs7840859(0.49)          | rs3808566(0.62)          | rs71517887(4)           |
| rs10783624  |     | <b>rs10783619(5.567)</b>  | rs10783624(-0.125)        | rs2060614(0.52)          | <b>rs10783619(0.05)</b>  | <b>rs10783619(3a)</b>   |
| rs1080500   |     | <b>rs1080500(14.34)</b>   | rs2246556(0.619)          | <b>rs1080500(0.46)</b>   | <b>rs1080500(0.28)</b>   | rs2257216(2b)           |
| rs10985817  |     | <b>rs2304390(15.60)</b>   | <b>rs2304390(0.683)</b>   | rs7867465(0.5)           | rs3780446(0.44)          | rs7867834(2b)           |
| rs11993663  |     | <b>rs73191547(7.284)</b>  | <b>rs73191547(0.763)</b>  | rs12548428(0.43)         | <b>rs73191547(0.16)</b>  | rs11787370(4)           |
| rs12129719  |     | <b>rs4077431(17.89)</b>   | <b>rs4077431(1.234)</b>   | <i>rs4133072(0.4)</i>    | <b>rs4077431(0.12)</b>   | <i>rs4133072(3a)</i>    |
| rs12447542  |     | <b>rs12447542(4.935)</b>  | <b>rs12447542(0.413)</b>  | <b>rs12447542(0.19)</b>  | <b>rs12447542(0.17)</b>  | <b>rs12447542(6)</b>    |
| rs12712510  |     | rs11894059(13.32)         | rs13031296(1.121)         | rs11886927(0.44)         | rs1509392(0.94)          | rs12996247(3a)          |
| rs13121251  |     | rs10011128(15.94)         | rs17016967(0.827)         | <b>rs1444950(0.56)</b>   | <b>rs1444950(0.25)</b>   | rs13145393(3a)          |
| rs1353545   |     | <b>rs1353545(17.89)</b>   | <b>rs1353545(1.55)</b>    | <b>rs1353545(0.53)</b>   | <b>rs1353545(0.97)</b>   | rs9867642(2a)           |
| rs150437760 |     | rs112952088(22.4)         | rs80087397(1.617)         | <b>rs113062316(0.52)</b> | <b>rs113062316(0.96)</b> | rs1253107(1f)           |
| rs17465671  |     | <i>rs6498914(8.890)</i>   | <i>rs6498914(0.502)</i>   | rs7193419(0.48)          | <b>rs11648018(0.05)</b>  | <b>rs11648018(6)</b>    |
| rs1765142   |     | <b>rs571174(16.50)</b>    | rs11031024(0.656)         | rs61626579(0.49)         | <b>rs571174(0.20)</b>    | rs4531442(2c)           |
| rs198160    |     | <b>rs28669242(6.798)</b>  | <b>rs28669242(0.588)</b>  | rs57846780(0.37)         | <b>rs28669242(0.05)</b>  | rs198160(6)             |
| rs2077586   |     | <b>rs112085582(16.29)</b> | <b>rs112085582(1.71)</b>  | rs2077586(0.55)          | <b>rs112085582(0.76)</b> | <b>rs112085582(2b)</b>  |
| rs2161711   |     | rs4788793(5.429)          | rs918754(0.149)           | rs75092065(0.36)         | <b>rs889704(0.05)</b>    | <b>rs889704(1f)</b>     |
| rs2410572   |     | <b>rs876983(16.44)</b>    | <b>rs876983(0.483)</b>    | rs13259407(0.33)         | <b>rs876983(0.27)</b>    | <b>rs876983(2b)</b>     |
| rs254782    |     | <b>rs34565637(13.42)</b>  | <b>rs34565637(1.33)</b>   | <b>rs34565637(0.74)</b>  | rs34087837(0.87)         | rs114843810(4)          |
| rs281299    |     | NA                        | NA                        | NA                       | <b>rs281299(0.04)</b>    | <b>rs281299(7)</b>      |
| rs28374258  |     | rs9427501(14.30)          | <b>rs2025512(0.528)</b>   | <b>rs2025512(0.5)</b>    | rs1454344(0.11)          | <b>rs2025512(4)</b>     |
| rs2917569   |     | rs2917570(10.05)          | NA                        | rs1939498(0.37)          | rs2509230(0.16)          | rs3018405(3a)           |
| rs312477    |     | <b>rs3774417(18.41)</b>   | <b>rs3774417(1.518)</b>   | rs312476(0.41)           | <b>rs3774417(0.37)</b>   | rs312475(4)             |
| rs34179565  |     | rs12433255(17.70)         | rs7140259(1.290)          | rs7142530(0.53)          | rs2300861(0.44)          | rs34179565(5)           |
| rs35736453  |     | rs3903663(8.721)          | rs12055782(1.010)         | rs28360516(0.5)          | rs1342646(0.83)          | rs7742212(4)            |
| rs36104021  |     | <b>rs4764719(18.88)</b>   | <b>rs4764719(0.967)</b>   | <b>rs4764719(0.46)</b>   | <b>rs4764719(0.91)</b>   | <b>rs4764719(2b)</b>    |
| rs4470825   |     | <b>rs147360061(4.174)</b> | <b>rs147360061(0.049)</b> | <b>rs147360061(0.5)</b>  | <b>rs147360061(0.05)</b> | rs628629(5)             |
| rs489939    |     | <b>rs308692(18.27)</b>    | <b>rs308692(1.141)</b>    | rs523441(0.46)           | rs518205(0.33)           | rs514683(3a)            |
| rs55669358  |     | <b>rs55916192(14.63)</b>  | <b>rs55916192(0.621)</b>  | rs74427054(0.56)         | rs55669358(0.85)         | rs72634609(6)           |
| rs56145559  |     | rs6546839(17.18)          | <b>rs7598396(1.049)</b>   | <b>rs7598396(0.54)</b>   | <b>rs7598396(0.31)</b>   | rs10496191(1f)          |
| rs56775891  |     | <b>rs7238071(5.169)</b>   | rs11664298(-0.082)        | rs56775891(0.48)         | rs6650631(0.06)          | <b>rs7238071(5)</b>     |
| rs58950470  |     | rs1193851(23.0)           | <b>rs7944860(1.60)</b>    | rs58950470(0.51)         | <b>rs7944860(0.41)</b>   | rs1787034(2a)           |
| rs6035706   |     | <b>rs6113023(8.008)</b>   | rs6137162(0.267)          | rs963487(0.42)           | <b>rs6113023(0.35)</b>   | <b>rs6113023(5)</b>     |
| rs634940    |     | rs10944593(16.94)         | <b>rs11970730(0.716)</b>  | rs1346296(0.39)          | <b>rs11970730(0.12)</b>  | rs582993(3a)            |
| rs6678676   |     | <b>rs4915424(3.493)</b>   | <b>rs4915424(0.0057)</b>  | rs6678676(0.34)          | <b>rs4915424(0.10)</b>   | rs7517753(4)            |
| rs6680011   |     | <b>rs7547222(9.705)</b>   | <b>rs7547222(0.434)</b>   | <i>rs4140419(0.45)</i>   | rs6680011(0.05)          | <i>rs4140419(4)</i>     |
| rs66885728  |     | <b>rs28591622(12.62)</b>  | rs57433322(0.70)          | rs28582509(0.49)         | <b>rs28591622(0.28)</b>  | rs1533034(2b)           |
| rs6701877   |     | <b>rs767053(19.17)</b>    | <b>rs767053(1.718)</b>    | <b>rs767053(0.58)</b>    | <b>rs767053(0.91)</b>    | rs10494491(1f)          |
| rs6800435   |     | <b>rs71316429(21.4)</b>   | <b>rs71316429(1.557)</b>  | <b>rs71316429(0.74)</b>  | <b>rs71316429(0.85)</b>  | rs57922516(3a)          |
| rs7225476   |     | <b>rs7221014(19.19)</b>   | <b>rs7221014(1.041)</b>   | rs7218776(0.43)          | <b>rs7221014(0.37)</b>   | rs8079792(1f)           |
| rs72342102  |     | rs2161972(15.37)          | <b>rs9373388(1.043)</b>   | rs9376742(0.5)           | <b>rs9373388(0.14)</b>   | <b>rs9373388(2b)</b>    |
| rs72769124  |     | rs6429121(5.770)          | rs10802742(-0.088)        | <b>rs28670059(0.35)</b>  | <b>rs28670059(0.05)</b>  | <b>rs28670059(4)</b>    |
| rs72986630  |     | <b>rs72986630(10.86)</b>  | <b>rs72986630(0.882)</b>  | <b>rs72986630(0.4)</b>   | <b>rs72986630(0.06)</b>  | <b>rs72986630(2a)</b>   |
| rs760608    |     | <b>rs9384900(16.23)</b>   | <b>rs9384900(0.620)</b>   | rs1337332(0.55)          | <i>rs7763992(0.16)</i>   | <i>rs7763992(5)</i>     |
| rs7632921   |     | <b>rs62244860(14.54)</b>  | <b>rs62244860(1.626)</b>  | <b>rs62244860(0.63)</b>  | <b>rs62244860(0.87)</b>  | rs6764416(3a)           |
| rs77853293  |     | rs8188099(10.90)          | rs1962832(0.502)          | rs7708897(0.51)          | rs7705285(0.08)          | rs11739291(2b)          |
| rs783540    |     | rs2567636(13.02)          | <b>rs4779050(0.918)</b>   | rs7178350(0.48)          | <b>rs4779050(0.29)</b>   | rs10906984(1f)          |
| rs893949    |     | <b>rs4937884(2.373)</b>   | NA                        | <b>rs4937884(0.29)</b>   | <b>rs4937884(0.06)</b>   | rs893949(2b)            |
| rs9545047   |     | <b>rs9545067(15.55)</b>   | <b>rs9545067(1.446)</b>   | rs9601242(0.58)          | rs56911077(0.86)         | rs943709(2b)            |
| rs9881798   |     | <b>rs9842181(14.42)</b>   | <b>rs9842181(0.561)</b>   | <b>rs9842181(0.37)</b>   | rs748832(0.38)           | rs9882532(3a)           |

Scores or ratings of each annotation method are shown in the parentheses. <sup>a-c</sup>For CADD, Eigen, GWAVA and LINSIGHT, the larger the score, the higher probability that the SNP is functional. For RegulomeDB, smaller rating suggests higher probability that the SNP is functional. The top functional SNP prioritized by at least two independent annotation approaches were shown in bold.

**Supplementary Table 2. The most possible functional SNPs identified by different annotation approaches (credible causal SNPs were from the study of Li *et al*<sup>21</sup>.)**

| Index_SNP<br>variant) | (or CADD <sup>a</sup>    | Eigen <sup>b</sup>       | GWAVA <sup>c</sup>      | LINSIGHT <sup>d</sup>   | RegulomeDB <sup>e</sup> |
|-----------------------|--------------------------|--------------------------|-------------------------|-------------------------|-------------------------|
| rs10148671            | <b>rs2333478(17.36)</b>  | <b>rs2333478(1.526)</b>  | rs75131751(0.65)        | rs76033949(0.90)        | rs932607(3a)            |
| rs10510653            | <b>rs62244394(15.95)</b> | <b>rs62244394(1.996)</b> | <b>rs62244394(0.62)</b> | rs76150980(0.55)        | <b>rs62244394(2b)</b>   |
| rs10940346            | rs555704(14.92)          | <b>rs28528780(1.351)</b> | <b>rs28528780(0.57)</b> | rs7341010(0.88)         | rs3849669(1f)           |
| rs111364339           | rs59113396(12.71)        | rs3816652(0.818)         | rs77788000(0.57)        | rs16918239(0.31)        | rs113960550(2a)         |
| rs11534004            | <b>rs7778798(20.5)</b>   | rs17682018(1.352)        | <b>rs7778798(0.55)</b>  | <b>rs7778798(0.94)</b>  | rs2905232(3a)           |
| rs11722779            | rs4699046(16.49)         | <b>rs223389(2.891)</b>   | <b>rs223389(0.64)</b>   | rs4699033(0.58)         | rs227361(1b)            |
| rs160593              | <b>rs314263(22.5)</b>    | <b>rs314263(1.366)</b>   | <b>rs314263(0.66)</b>   | <b>rs314263(0.52)</b>   | rs12213967(2b)          |
| rs17687067            | <b>rs11555738(12.58)</b> | <b>rs11555738(1.297)</b> | rs117220747(0.46)       | <i>rs3808645(0.21)</i>  | <i>rs3808645(2b)</i>    |
| rs2073499             | <b>rs2236950(20.1)</b>   | rs2073499(1.824)         | <b>rs2236950(0.77)</b>  | <b>rs2236950(0.98)</b>  | rs2624842(1d)           |
| rs2247870             | rs11738573(13.54)        | <b>rs2438345(1.445)</b>  | <b>rs2438345(0.57)</b>  | <b>rs2438345(0.39)</b>  | <b>rs2438345(2a)</b>    |
| rs2383377             | <b>rs11156763(7.248)</b> | <i>rs61981393(0.384)</i> | rs60535335(0.41)        | <i>rs61981393(0.07)</i> | <b>rs11156763(6)</b>    |
| rs2764766             | rs151882(13.66)          | rs13173755(0.434)        | rs245179(0.47)          | rs245183(0.34)          | rs4836348(1d)           |
| rs28607014            | rs2393207(10.24)         | <b>rs9658255(0.297)</b>  | <b>rs9658255(0.51)</b>  | rs2293051(0.19)         | rs561712(3a)            |
| rs28735056            | rs34977373(12.79)        | <b>rs2012687(0.429)</b>  | <b>rs2012687(0.48)</b>  | rs3744881(0.16)         | rs4799092(2b)           |
| rs323167              | <b>rs4727751(19.40)</b>  | <b>rs4727751(1.591)</b>  | rs323176(0.53)          | <b>rs4727751(0.93)</b>  | rs322004(2b)            |
| rs35065479            | <b>rs4793885(19.61)</b>  | <b>rs4793885(1.228)</b>  | rs4793560(0.48)         | rs16942143(0.66)        | rs12936628(3a)          |
| rs4479915             | rs12192875(12.11)        | rs11753244(0.915)        | rs903791(0.48)          | rs71569466(0.48)        | rs9347899(4)            |
| rs56007784            | rs35640767(10.79)        | rs28365859(1.415)        | rs16945571(0.46)        | rs4790360(0.13)         | rs12601838(2b)          |
| rs56775891            | rs7238071(5.169)         | <b>rs11081564(0.556)</b> | rs56775891(0.48)        | <b>rs11081564(0.08)</b> | <b>rs11081564(2b)</b>   |
| rs62152284            | <b>rs4851036(20.6)</b>   | <b>rs4851036(0.987)</b>  | <b>rs4851036(0.58)</b>  | <b>rs4851036(0.43)</b>  | rs73946422(4)           |
| rs6430491             | <i>rs10928478(15.01)</i> | <b>rs1812665(1.490)</b>  | rs764686(0.45)          | <i>rs10928478(0.17)</i> | <b>rs1812665(2b)</b>    |
| rs6500596             | <b>rs3747579(26.7)</b>   | <i>rs709632(2.634)</i>   | <b>rs3747579(0.67)</b>  | <i>rs709632(0.94)</i>   | rs4238849(1b)           |
| rs6903570             | rs9353806(22.1)          | <b>rs34848022(1.478)</b> | rs9342117(0.52)         | <b>rs34848022(0.95)</b> | rs9344660(2b)           |
| rs72843506            | rs9908032(23.7)          | rs9898948(0.763)         | <b>rs9894159(0.59)</b>  | <b>rs9894159(0.61)</b>  | rs16960717(1f)          |
| rs73219805            | rs73217710(9.487)        | rs17310286(0.621)        | rs1048527(0.62)         | rs3808566(0.62)         | rs17055142(4)           |
| rs758129              | rs17803620(23.4)         | rs150299(1.482)          | rs2283432(0.57)         | rs2246900(0.59)         | rs961288(2a)            |
| rs7757969             | <b>rs9384804(19.30)</b>  | <b>rs9384804(1.154)</b>  | rs6919306(0.59)         | rs12055398(0.29)        | rs58691769(2a)          |
| rs783540              | <b>rs11630197(26.8)</b>  | <i>rs4779050(0.917)</i>  | rs11631813(0.56)        | <i>rs4779050(0.29)</i>  | <b>rs11630197(1c)</b>   |
| rs8012642             | <b>rs4144367(20.8)</b>   | <b>rs4144367(0.829)</b>  | rs8021077(0.53)         | <b>rs4144367(0.25)</b>  | rs28637508(3a)          |
| rs8058130             | <b>rs12920359(17.36)</b> | <b>rs12920359(1.194)</b> | rs318202(0.47)          | <b>rs12920359(0.34)</b> | rs650856(3a)            |
| rs999494              | <b>rs61152410(19.52)</b> | <b>rs61152410(1.20)</b>  | rs2077586(0.55)         | <b>rs61152410(0.44)</b> | rs34419497(4)           |

Scores or ratings of each annotation method are shown in the parentheses. <sup>a-c</sup>For CADD, Eigen, GWAVA and LINSIGHT, the larger the score, the higher probability that the SNP is functional. For RegulomeDB, smaller rating suggests higher probability that the SNP is functional. The top functional SNP prioritized by at least two independent annotation approaches were shown in bold.

**Supplementary Table 3. Brain tissues and number of subjects used in GTEx.**

| <b>Tissue</b>                             | <b>Number of samples with genotypes and expression</b> |
|-------------------------------------------|--------------------------------------------------------|
| Brain - Cerebellum                        | 154                                                    |
| Brain - Caudate (basal ganglia)           | 144                                                    |
| Brain - Cortex                            | 136                                                    |
| Brain - Nucleus accumbens (basal ganglia) | 130                                                    |
| Brain - Cerebellar Hemisphere             | 125                                                    |
| Brain - Frontal Cortex (BA9)              | 118                                                    |
| Brain - Putamen (basal ganglia)           | 111                                                    |
| Brain - Hippocampus                       | 111                                                    |
| Brain - Anterior cingulate cortex (BA24)  | 109                                                    |
| Brain - Hypothalamus                      | 108                                                    |
| Brain - Amygdala                          | 88                                                     |
| Brain - Spinal cord (cervical c-1)        | 83                                                     |
| Brain - Substantia nigra                  | 80                                                     |



**Supplementary Table 4. ChIP-Seq experiments and TFs used in this study.**

| Brain tissues and neuronal cell lines | Lab                                                 | Data source | TFs                                        | The name of biosamples in this paper |
|---------------------------------------|-----------------------------------------------------|-------------|--------------------------------------------|--------------------------------------|
| Astrocyte of the cerebellum BE2C      | John Stamatoyannopoulos, UW                         | ENCODE      | CTCF                                       | Astrocyte of the cerebellum BE2C     |
| Brain microvascular endothelial cell  | John Stamatoyannopoulos, UW                         | ENCODE      | CTCF                                       | Brain microvascular endothelial cell |
| Choroid plexus epithelial cell H54    | John Stamatoyannopoulos, UW<br>Vishwanath Iyer, UTA | ENCODE      | CTCF, POLR2A                               | Choroid plexus epithelial cell H54   |
| Medulloblastoma                       | Vishwanath Iyer, UTA                                | ENCODE      | CTCF                                       | Medulloblastoma                      |
| Neural cell derived from H1-hESC      | Michael Snyder, Stanford                            | ENCODE      | CTCF, MXI1, RAD21, SMC3                    | Neural-M                             |
| Neural cell <sup>a</sup>              | Bradley Bernstein, Broad                            | ENCODE      | EZH2                                       | Neural-B                             |
| Neural cell <sup>a</sup>              | Richard Myers, HAIB                                 | ENCODE      | POLR2A, REST, TAF1                         | Neural-R                             |
| PFSK-1 <sup>b</sup>                   | Richard Myers, HAIB                                 | ENCODE      | FOXP2, REST                                | PFSK-1                               |
| PFSK-1 <sup>b</sup>                   | Richard Myers, HAIB                                 | ENCODE      | POLR2A, REST, SIN3A, TAF1                  | PFSK-1-1                             |
| SH-SY5Y                               | Peggy Farnham, USC                                  | ENCODE      | GATA2, GATA3                               | SH-SY5Y                              |
| SK-N-MC                               | Bradley Bernstein, Broad                            | ENCODE      | EZH2                                       | SK-N-MC-B                            |
| SK-N-MC                               | Richard Myers, HAIB                                 | ENCODE      | FOXP2, POLR2A                              | SK-N-MC-R                            |
| SK-N-SH                               | Bradley Bernstein, Broad                            | ENCODE      | CTCF, EZH2                                 | SK-N-SH-B                            |
| SK-N-SH                               | John Stamatoyannopoulos, UW                         | ENCODE      | CTCF                                       | SK-N-SH-J                            |
| SK-N-SH                               | Michael Snyder, Stanford                            | ENCODE      | CTCF, EP300, JUND, MXI1, NRF1, RAD21,      | SK-N-SH-M                            |
| SK-N-SH                               | Michael Snyder, Stanford                            | ENCODE      | CHD2, IRF3, RCOR1, USF2                    | SK-N-SH-M-1                          |
| SK-N-SH                               | Richard Myers, HAIB                                 | ENCODE      | ELF1, EP300, FOSL2,                        | SK-N-SH-R                            |
| SK-N-SH                               | Richard Myers, HAIB                                 | ENCODE      | FOXMI1, GABPA, GATA3, POLR2A, REST, SIN3A, | SK-N-SH-R-1                          |
| SK-N-SH                               | Richard Myers, HAIB                                 | ENCODE      | TAF1, CTCF, EP300, RAD21, USF1, YY1        | SK-N-SH-R-2                          |

<sup>a</sup>Neural cell: In vitro differentiated neural cells from male embryo. <sup>b</sup>PFSK-1 is a neuroectodermal cell line derived from a human cerebral brain tumor.

**Supplementary Table 5. Association significance between the TF binding-disrupting SNPs and gene expression in human brain tissues**

| SNP        | Gene              | P (CMC)  | FDR (CMC) | P (LIBD) | FDR (LIBD) | P (GTEx)               |
|------------|-------------------|----------|-----------|----------|------------|------------------------|
| rs10038801 | <i>SLCO4C1</i>    | 6.32E-27 | 3.89E-24  | 7.70E-14 | 2.34E-11   | NA                     |
| rs10795    | <i>DNM1P51</i>    | NA       | NA        | 3.65E-06 | 3.28E-04   | 1.40E-06 (Front Cor)   |
|            | <i>GOLGA2P7</i>   | 1.63E-17 | 6.37E-15  | 1.07E-09 | 1.88E-07   | 4.50E-13 (Cau)         |
|            | <i>NMB</i>        | 6.34E-04 | 2.33E-02  | NA       | NA         | 8.10E-06 (Cau)         |
|            | <i>WDR73</i>      | 1.05E-03 | 3.48E-02  | 1.03E-05 | 8.29E-04   | NA                     |
| rs10852932 | <i>SRR</i>        | 5.79E-20 | 5.57E-18  | 2.87E-10 | 5.50E-08   | NA                     |
| rs11861362 | <i>TSNAXIP1</i>   | 4.77E-04 | 2.73E-02  | NA       | NA         | 1.00E-07 (ACC)         |
| rs12114661 | <i>TNKS</i>       | 7.94E-06 | 5.34E-04  | 1.40E-08 | 2.06E-06   | NA                     |
| rs12136320 | <i>TMEM81</i>     | 2.97E-05 | 2.00E-03  | 9.91E-06 | 7.98E-04   | 1.10E-06 (Putamen)     |
|            | <i>TMCC2</i>      | 4.30E-07 | 4.34E-05  | 1.68E-04 | 9.27E-03   | NA                     |
|            | <i>RBBP5</i>      | 5.87E-09 | 8.26E-07  | NA       | NA         | 8.80E-08 (NAc)         |
| rs12416331 | <i>CNNM2</i>      | 1.37E-04 | 6.09E-03  | 1.31E-06 | 1.31E-04   | NA                     |
| rs12912934 | <i>CSPG4P11</i>   | 3.11E-44 | 1.21E-40  | NA       | NA         | 3.20E-07 (Cere)        |
|            | <i>EFTUD1P1</i>   | 4.07E-13 | 9.63E-11  | 8.48E-07 | 8.84E-05   | 1.10E-05 (Hyp)         |
|            | <i>CSPG4P12</i>   | 3.36E-33 | 4.92E-30  | NA       | NA         | 3.40E-07 (Front Cor)   |
|            | <i>DNM1P51</i>    | 9.84E-05 | 4.96E-03  | 5.54E-10 | 1.02E-07   | 2.50E-11 (Front Cor)   |
|            | <i>GOLGA6L5</i>   | NA       | NA        | 4.94E-07 | 5.41E-05   | 1.30E-07 (Cortex)      |
|            | <i>GOLGA2P7</i>   | 2.75E-28 | 2.91E-25  | 9.30E-19 | 4.52E-16   | 1.20E-24 (Cau)         |
| rs13113099 | <i>KRT8P46</i>    | 1.12E-11 | 1.56E-09  | NA       | NA         | 1.30E-05 (Cere Hemi)   |
|            | <i>LRRC37A15P</i> | 3.76E-12 | 5.59E-10  | NA       | NA         | 3.40E-07 (Cere Hemi)   |
|            | <i>BDH2</i>       | 8.59E-07 | 5.83E-05  | 1.16E-04 | 6.78E-03   | NA                     |
| rs1321     | <i>ALG12</i>      | 9.34E-07 | 8.95E-05  | NA       | NA         | 5.50E-07 (Cau)         |
| rs138833   | <i>ALG12</i>      | 1.80E-06 | 1.63E-04  | NA       | NA         | 1.10E-05 (Cau)         |
| rs159961   | <i>RERE</i>       | 6.39E-04 | 2.74E-02  | 5.93E-10 | 1.08E-07   | NA                     |
| rs16937    | <i>TMEM81</i>     | 1.06E-05 | 8.06E-04  | 3.64E-10 | 6.88E-08   | 9.70E-07 (Putamen)     |
|            | <i>RBBP5</i>      | 1.16E-09 | 1.84E-07  | 1.53E-04 | 8.56E-03   | 2.70E-09 (NAc)         |
| rs1801311  | <i>LINC00634</i>  | 2.40E-08 | 3.08E-06  | 1.91E-08 | 2.73E-06   | NA                     |
|            | <i>CYP2D7P</i>    | NA       | NA        | 4.17E-12 | 1.03E-09   | 1.10E-05 (NAc)         |
|            | <i>NAGA</i>       | 4.06E-17 | 1.43E-14  | 4.46E-29 | 4.42E-26   | 5.70E-10 (Cere)        |
|            | <i>FAM109B</i>    | 1.46E-06 | 1.34E-04  | 6.23E-17 | 2.58E-14   | 6.30E-06 (Cortex)      |
| rs223387   | <i>LRRC37A15P</i> | 2.84E-13 | 4.96E-11  | NA       | NA         | 1.80E-09 (Cere Hemi)   |
| rs223390   | <i>LRRC37A15P</i> | 2.58E-13 | 4.55E-11  | 1.43E-04 | 8.10E-03   | 2.30E-09 (Cere Hemi)   |
|            | <i>BDH2</i>       | 5.34E-07 | 3.75E-05  | 1.37E-04 | 7.80E-03   | NA                     |
| rs2269524  | <i>LINC00634</i>  | 2.33E-08 | 3.01E-06  | 1.01E-09 | 1.78E-07   | NA                     |
|            | <i>CYP2D7P</i>    | NA       | NA        | 8.48E-09 | 1.29E-06   | 1.10E-05 (NAc )        |
|            | <i>NAGA</i>       | 5.33E-18 | 2.03E-15  | 1.04E-26 | 8.81E-24   | 2.90E-09 (Cere)        |
|            | <i>SMDT1</i>      | NA       | NA        | 3.91E-06 | 3.49E-04   | 4.90E-30 (Cere)        |
|            | <i>FAM109B</i>    | 1.02E-06 | 9.73E-05  | 7.35E-16 | 2.77E-13   | 5.80E-06 (Cortex)      |
| rs2270363  | <i>CORO7</i>      | 2.06E-10 | 5.06E-08  | 1.72E-17 | 7.46E-15   | 8.90E-13 (ACC)         |
|            | <i>NMRAL1</i>     | 1.62E-10 | 4.05E-08  | 4.88E-16 | 1.87E-13   | 9.00E-41 (Cere Hemi)   |
|            | <i>DNAJA3</i>     | 8.22E-31 | 1.17E-27  | 2.21E-06 | 2.09E-04   | NA                     |
|            | <i>CDIP1</i>      | 3.05E-07 | 4.40E-05  | 1.43E-05 | 1.11E-03   | 5.10E-34 (Cere)        |
| rs2304204  | <i>CPT1C</i>      | 8.51E-14 | 2.55E-11  | 4.56E-05 | 3.05E-03   | 2.00E-05 (Cere)        |
|            | <i>IRF3</i>       | 1.50E-05 | 1.30E-03  | NA       | NA         | 1.90E-07 (Cere Hemi)   |
| rs2304206  | <i>CPT1C</i>      | 2.57E-13 | 7.33E-11  | 1.38E-06 | 1.38E-04   | NA                     |
|            | <i>IRF3</i>       | 1.27E-05 | 1.13E-03  | NA       | NA         | 5.10E-08 (Cere Hemi)   |
| rs2385395  | <i>CNPPD1</i>     | 4.21E-06 | 3.11E-04  | 1.10E-06 | 1.12E-04   | 4.10E-11 (Spinal cord) |
| rs2535629  | <i>MUSTN1</i>     | 1.93E-05 | 1.36E-03  | 6.38E-10 | 1.16E-07   | NA                     |
|            | <i>GNL3</i>       | NA       | NA        | 5.81E-07 | 6.27E-05   | 4.80E-08 (Cere)        |
|            | <i>NEK4</i>       | 2.81E-10 | 5.30E-08  | 4.59E-06 | 4.03E-04   | NA                     |
| rs2551945  | <i>METTL21A</i>   | 4.54E-16 | 1.52E-13  | 1.12E-08 | 1.67E-06   | NA                     |
|            | <i>CREB1</i>      | 1.24E-08 | 1.49E-06  | 7.48E-05 | 4.66E-03   | NA                     |
| rs2711116  | <i>DFNA5</i>      | 5.07E-04 | 1.88E-02  | 6.63E-08 | 8.62E-06   | 2.00E-07 (Cortex)      |
| rs281759   | <i>FTCDNLI</i>    | 2.98E-13 | 6.79E-11  | 3.92E-11 | 8.51E-09   | 2.00E-06 (Hyp)         |
|            | <i>TYW5</i>       | 2.25E-09 | 3.07E-07  | 1.80E-06 | 1.74E-04   | 5.60E-09 (Cere Hemi)   |
| rs2856268  | <i>RLBP1</i>      | 2.58E-12 | 5.56E-10  | 1.28E-08 | 1.89E-06   | 6.50E-06 (Cortex)      |

|            |                   |          |          |          |          |                        |
|------------|-------------------|----------|----------|----------|----------|------------------------|
| rs28633410 | <i>POLG</i>       | 5.20E-05 | 2.87E-03 | 4.47E-06 | 3.93E-04 | 7.20E-09 (Cere)        |
|            | <i>LINC00634</i>  | 3.33E-07 | 3.53E-05 | 2.30E-06 | 2.17E-04 | NA                     |
|            | <i>NAGA</i>       | 4.05E-17 | 1.43E-14 | 2.92E-22 | 1.86E-19 | NA                     |
| rs2974999  | <i>FAM109B</i>    | 4.52E-07 | 4.66E-05 | 3.40E-06 | 3.08E-04 | NA                     |
|            | <i>TOM1L2</i>     | 6.61E-14 | 4.75E-12 | 1.20E-04 | 6.97E-03 | 2.90E-06 (Cere)        |
| rs301792   | <i>REER</i>       | 5.90E-04 | 2.57E-02 | 3.65E-07 | 4.10E-05 | NA                     |
| rs3131340  | <i>ZNF192P1</i>   | 2.19E-05 | 1.00E-03 | NA       | NA       | 7.40E-08 (Cere)        |
|            | <i>ZNF323</i>     | 1.75E-04 | 6.31E-03 | NA       | NA       | 2.20E-05 (Spinal cord) |
|            | <i>ZNF193</i>     | 1.63E-04 | 5.93E-03 | NA       | NA       | 1.70E-05 (Cere)        |
| rs340836   | <i>PROX1-AS1</i>  | 9.71E-06 | 7.46E-04 | 3.16E-07 | 3.60E-05 | 3.30E-07 (Cere)        |
| rs3743078  | <i>CHRNA5</i>     | NA       | NA       | 1.12E-10 | 2.28E-08 | 2.20E-06 (Putamen)     |
| rs3773744  | <i>TKT</i>        | 1.91E-05 | 1.35E-03 | NA       | NA       | 1.90E-07 (Spinal cord) |
| rs3773745  | <i>TKT</i>        | 1.92E-05 | 1.35E-03 | NA       | NA       | 1.90E-07 (Spinal cord) |
| rs3794993  | <i>YJEFN3</i>     | 3.87E-04 | 2.26E-02 | 9.66E-10 | 1.71E-07 | NA                     |
| rs3814880  | <i>GATAD2A</i>    | 2.83E-35 | 4.68E-32 | 4.76E-12 | 1.17E-09 | NA                     |
|            | <i>INO80E</i>     | 2.28E-13 | 7.83E-11 | 7.60E-29 | 7.44E-26 | 3.30E-10 (Cere)        |
|            | <i>MAPK3</i>      | 8.56E-07 | 1.10E-04 | 1.01E-06 | 1.03E-04 | NA                     |
| rs3822346  | <i>YPEL3</i>      | NA       | NA       | 5.52E-06 | 4.74E-04 | 4.80E-08 (Cere)        |
|            | <i>PCDHA10</i>    | 1.96E-14 | 4.50E-12 | 1.30E-13 | 3.86E-11 | 1.40E-11 (Front Cor)   |
|            | <i>PCDHA13</i>    | 3.90E-19 | 1.49E-16 | 3.21E-14 | 1.02E-11 | 4.90E-10 (Cere Hemi)   |
|            | <i>PCDHA1</i>     | NA       | NA       | 2.62E-07 | 3.03E-05 | 1.00E-09 (Cere)        |
|            | <i>PCDHA2</i>     | 3.69E-08 | 3.96E-06 | 3.96E-06 | 3.53E-04 | 6.80E-08 (Cere)        |
|            | <i>PCDHA7</i>     | 9.78E-20 | 4.04E-17 | 1.30E-14 | 4.29E-12 | 5.80E-09 (Spinal cord) |
|            | <i>PCDHA8</i>     | 2.43E-18 | 8.29E-16 | 5.03E-32 | 5.90E-29 | 3.20E-07 (Cere Hemi)   |
|            | <i>PCDHA9</i>     | NA       | NA       | 6.19E-18 | 2.80E-15 | 6.90E-07 (Cere Hemi)   |
|            | <i>ZMAT2</i>      | 1.30E-10 | 2.00E-08 | 1.10E-08 | 1.65E-06 | NA                     |
|            | <i>WDR55</i>      | 9.48E-04 | 3.35E-02 | NA       | NA       | 5.00E-06 (Cere)        |
| rs393223   | <i>IK</i>         | 8.96E-04 | 3.20E-02 | 3.49E-05 | 2.41E-03 | NA                     |
|            | <i>TMCO6</i>      | NA       | NA       | 8.82E-05 | 5.37E-03 | 1.20E-07 (Cere)        |
|            | <i>KRT8P46</i>    | 1.06E-16 | 2.61E-14 | NA       | NA       | 2.60E-06 (ACC)         |
| rs4785581  | <i>LRRC37A15P</i> | 2.62E-18 | 7.13E-16 | NA       | NA       | 6.10E-08 (Cere Hemi)   |
| rs4786494  | <i>C16orf55</i>   | 5.16E-15 | 2.09E-12 | NA       | NA       | 1.70E-06 (Cortex)      |
| rs486781   | <i>CORO7</i>      | 2.78E-10 | 6.71E-08 | 2.57E-20 | 1.42E-17 | 3.10E-13 (ACC)         |
|            | <i>NMRAL1</i>     | 4.49E-11 | 1.20E-08 | NA       | NA       | 4.30E-39 (Cere Hemi)   |
|            | <i>CDIP1</i>      | 1.17E-07 | 1.84E-05 | NA       | NA       | 8.80E-29 (Cere)        |
| rs4924832  | <i>FAM86B3P</i>   | 4.91E-28 | 4.67E-25 | NA       | NA       | 3.60E-14 (Cere)        |
| rs5751195  | <i>TOM1L2</i>     | 5.31E-17 | 4.43E-15 | NA       | NA       | 1.30E-06 (Cere)        |
| rs6002621  | <i>OLA1P1</i>     | NA       | NA       | 7.24E-05 | 4.53E-03 | 6.10E-06 (Sub nig)     |
|            | <i>LINC00634</i>  | 5.05E-09 | 7.29E-07 | 3.41E-14 | 1.08E-11 | NA                     |
|            | <i>NAGA</i>       | 6.64E-19 | 2.71E-16 | 1.49E-23 | 1.03E-20 | 1.80E-21 (Cere)        |
|            | <i>WBP2NL</i>     | 2.05E-41 | 4.08E-38 | 7.53E-12 | 1.81E-09 | 2.70E-09 (ACC)         |
|            | <i>FAM109B</i>    | 7.52E-08 | 8.87E-06 | 2.24E-06 | 2.12E-04 | NA                     |
|            | <i>CYP2D6</i>     | NA       | NA       | 8.60E-11 | 1.78E-08 | 2.00E-15 (Hyp)         |
|            | <i>LINC00634</i>  | 2.45E-08 | 3.14E-06 | 2.70E-07 | 3.13E-05 | NA                     |
| rs61660810 | <i>NAGA</i>       | 2.19E-17 | 7.87E-15 | 1.87E-23 | 1.29E-20 | 2.60E-09 (Cere)        |
|            | <i>SMDT1</i>      | NA       | NA       | 2.04E-05 | 1.51E-03 | 6.60E-29 (Cere)        |
|            | <i>FAM109B</i>    | 3.09E-06 | 2.67E-04 | 3.53E-15 | 1.24E-12 | 3.40E-06 (Cortex)      |
|            | <i>NOS2P3</i>     | NA       | NA       | 1.06E-06 | 1.09E-04 | 8.60E-08 (NAc)         |
| rs6795127  | <i>USP32P3</i>    | 5.82E-10 | 3.21E-08 | 1.40E-04 | 7.96E-03 | 2.00E-06 (Cortex)      |
|            | <i>CCDC144C</i>   | 4.37E-20 | 4.22E-18 | NA       | NA       | 1.30E-05 (Putamen)     |
|            | <i>TKT</i>        | 1.37E-04 | 7.36E-03 | NA       | NA       | 2.40E-09 (Spinal cord) |
| rs6992091  | <i>FAM85B</i>     | NA       | NA       | 1.75E-08 | 2.53E-06 | 2.40E-09 (Cortex)      |
| rs7012106  | <i>FAM86B3P</i>   | 5.79E-29 | 5.69E-26 | 7.93E-29 | 7.76E-26 | 7.30E-10 (Front Cor)   |
| rs7014953  | <i>FAM83H</i>     | 3.07E-15 | 1.10E-12 | NA       | NA       | 1.50E-10 (Cere)        |
| rs72748702 | <i>FAM85B</i>     | NA       | NA       | 3.69E-08 | 5.02E-06 | 1.40E-09 (Cortex)      |
|            | <i>FAM86B3P</i>   | 2.19E-29 | 2.19E-26 | 1.01E-26 | 8.58E-24 | 3.10E-09 (Front Cor)   |
|            | <i>CSPG4P11</i>   | 4.48E-42 | 1.36E-38 | NA       | NA       | 1.20E-07 (Cere)        |
|            | <i>EFTUD1P1</i>   | 7.36E-14 | 1.95E-11 | 2.07E-06 | 1.97E-04 | 1.40E-05 (Hyp)         |
| rs72748702 | <i>CSPG4P12</i>   | 2.54E-31 | 3.34E-28 | NA       | NA       | 3.80E-07 (Front Cor)   |
|            | <i>DNM1P51</i>    | 1.33E-04 | 6.41E-03 | 5.39E-09 | 8.46E-07 | 2.20E-11 (Front Cor)   |

|            |                  |          |          |          |          |                      |
|------------|------------------|----------|----------|----------|----------|----------------------|
|            | <i>GOLGA6L5</i>  | NA       | NA       | 1.01E-06 | 1.04E-04 | 2.00E-07 (Cortex)    |
|            | <i>GOLGA2P7</i>  | 1.40E-27 | 1.40E-24 | 2.36E-18 | 1.11E-15 | 1.90E-24(Cau)        |
| rs7579996  | <i>SEPT10</i>    | 2.67E-20 | 1.36E-17 | 3.37E-08 | 4.63E-06 | NA                   |
| rs778593   | <i>PCDHA10</i>   | 5.19E-10 | 7.48E-08 | 1.50E-12 | 3.93E-10 | 2.40E-08 (Front Cor) |
|            | <i>PCDHA13</i>   | 1.06E-12 | 2.08E-10 | 2.60E-10 | 5.03E-08 | 4.00E-06 (Cere)      |
|            | <i>SRA1</i>      | 2.73E-08 | 3.00E-06 | 1.41E-04 | 8.02E-03 | NA                   |
|            | <i>PCDHA1</i>    | NA       | NA       | 2.02E-08 | 2.89E-06 | 3.60E-10 (Cere)      |
|            | <i>PCDHA2</i>    | 2.45E-08 | 2.71E-06 | NA       | NA       | 1.10E-07 (Cere)      |
|            | <i>PCDHA7</i>    | 1.55E-13 | 3.29E-11 | 3.34E-12 | 8.39E-10 | NA                   |
|            | <i>PCDHA8</i>    | 4.71E-14 | 1.04E-11 | 6.25E-21 | 3.61E-18 | 9.10E-06 (Cere Hemi) |
|            | <i>ZMAT2</i>     | 6.87E-10 | 9.75E-08 | 1.28E-08 | 1.90E-06 | 2.40E-06 (ACC)       |
|            | <i>NDUFA2</i>    | 7.05E-07 | 6.08E-05 | 2.01E-06 | 1.92E-04 | NA                   |
|            | <i>WDR55</i>     | 1.27E-04 | 6.37E-03 | 3.83E-05 | 2.62E-03 | 1.90E-06 (Cere)      |
|            | <i>IK</i>        | 8.00E-04 | 2.92E-02 | 1.52E-04 | 8.52E-03 | NA                   |
|            | <i>TMC06</i>     | NA       | NA       | 1.76E-06 | 1.71E-04 | 3.80E-15 (Cere)      |
| rs78532287 | <i>USP32P3</i>   | 4.48E-10 | 2.49E-08 | 9.14E-13 | 2.46E-10 | 5.60E-06 (NAc)       |
|            | <i>CCDC144C</i>  | 6.20E-17 | 5.16E-15 | 2.90E-11 | 6.42E-09 | 1.70E-06 (Putamen)   |
| rs796364   | <i>FTCDNL1</i>   | 1.01E-13 | 2.46E-11 | 9.50E-09 | 1.44E-06 | 5.80E-07 (Hyp)       |
|            | <i>TYW5</i>      | 1.28E-08 | 1.54E-06 | 1.99E-06 | 1.91E-04 | 2.50E-08 (Cere Hemi) |
| rs8135801  | <i>LINC00634</i> | 1.39E-08 | 1.85E-06 | 3.62E-08 | 4.94E-06 | NA                   |
|            | <i>CYP2D7P</i>   | NA       | NA       | 4.45E-12 | 1.10E-09 | 6.70E-06 (NAc)       |
|            | <i>NAGA</i>      | 1.14E-17 | 4.22E-15 | 6.67E-29 | 6.55E-26 | 5.10E-09 (Cere)      |
|            | <i>FAM109B</i>   | 6.60E-07 | 6.55E-05 | 3.84E-17 | 1.62E-14 | 6.30E-06 (Cortex)    |
| rs910800   | <i>ALG12</i>     | 5.31E-07 | 5.40E-05 | NA       | NA       | 5.60E-07 (Cau)       |
| rs9306356  | <i>CENPM</i>     | NA       | NA       | 1.03E-07 | 1.29E-05 | 1.20E-05 (Cere Hemi) |
| rs9362397  | <i>C6orf162</i>  | 3.16E-21 | 1.01E-18 | 4.47E-25 | 3.42E-22 | 7.70E-17 (Cere)      |

Brain tissues from the dorsolateral prefrontal cortex (DLPFC) were used in CMC (N=467) and LIBD brain eQTL browser (N=412). Tissues from 8 brain regions were used in GTEx. Front Cor: Frontal Cortex; Cau: Caudate; ACC:Anterior cingulate cortex; NAc: Nucleus accumbens; Cere:Cerebellum; Hyp: Hypothalamus; Cere Hemi:Cerebellar Hemisphere; Sub nig: Substantia nigra. NA, not available. SNPs that showed significant association with the expression of the same gene in at least two independent eQTL datasets were shown.

**Supplementary Table 6. The linkage disequilibrium values between the TF binding-disrupting SNPs**

| <b>ORSID<sup>a</sup></b> | <b>RSID<sup>b</sup></b> | <b>CHR<sup>c</sup></b> | <b>POS1<sup>d</sup></b> | <b>POS2<sup>e</sup></b> | <b>DIST<sup>f</sup></b> | <b>R2<sup>g</sup></b> |
|--------------------------|-------------------------|------------------------|-------------------------|-------------------------|-------------------------|-----------------------|
| rs10083370               | rs10083367              | 14                     | 104314182               | 104314183               | 1                       | 1                     |
| rs11986122               | rs11993089              | 8                      | 10009949                | 10009952                | 3                       | 0.995827              |
| rs12114661               | rs11986122              | 8                      | 9573154                 | 10009949                | 436795                  | 0.463898              |
| rs12114661               | rs11993089              | 8                      | 9573154                 | 10009952                | 436798                  | 0.466285              |
| rs1321                   | rs9616378               | 22                     | 50297435                | 50311973                | 14538                   | 0.888207              |
| rs1321                   | rs9616382               | 22                     | 50297435                | 50312979                | 15544                   | 0.888207              |
| rs1321                   | rs7410601               | 22                     | 50297435                | 50317187                | 19752                   | 0.940927              |
| rs138833                 | rs910800                | 22                     | 50178917                | 50278642                | 99725                   | 0.852402              |
| rs138833                 | rs1321                  | 22                     | 50178917                | 50297435                | 118518                  | 0.863565              |
| rs138833                 | rs9616378               | 22                     | 50178917                | 50311973                | 133056                  | 0.760177              |
| rs138833                 | rs9616382               | 22                     | 50178917                | 50312979                | 134062                  | 0.760177              |
| rs138833                 | rs7410601               | 22                     | 50178917                | 50317187                | 138270                  | 0.80946               |
| rs16937                  | rs12136320              | 1                      | 205035455               | 205110946               | 75491                   | 0.729726              |
| rs1801311                | rs6002621               | 22                     | 42486723                | 42511002                | 24279                   | 0.991128              |
| rs1801311                | rs28633410              | 22                     | 42486723                | 42527471                | 40748                   | 0.880251              |
| rs2027349                | rs72694957              | 1                      | 150039678               | 150135291               | 95613                   | 0.932557              |
| rs223387                 | rs13113099              | 4                      | 103749516               | 103974122               | 224606                  | 0.341826              |
| rs223390                 | rs223387                | 4                      | 103748797               | 103749516               | 719                     | 0.996031              |
| rs223390                 | rs13113099              | 4                      | 103748797               | 103974122               | 225325                  | 0.344707              |
| rs2269524                | rs1801311               | 22                     | 42475703                | 42486723                | 11020                   | 0.986732              |
| rs2269524                | rs6002621               | 22                     | 42475703                | 42511002                | 35299                   | 0.977899              |
| rs2269524                | rs28633410              | 22                     | 42475703                | 42527471                | 51768                   | 0.86787               |
| rs2304206                | rs2304204               | 19                     | 50168871                | 50169020                | 149                     | 1                     |
| rs2905232                | rs7796648               | 7                      | 113392567               | 113460326               | 67759                   | 0.869758              |
| rs301792                 | rs159961                | 1                      | 8468278                 | 8484228                 | 15950                   | 0.986171              |
| rs321964                 | rs322004                | 7                      | 78315591                | 78332416                | 16825                   | 0.610739              |
| rs34455584               | rs1805579               | 3                      | 180630191               | 180630565               | 374                     | 0.931237              |
| rs3773744                | rs3773745               | 3                      | 53270344                | 53270424                | 80                      | 1                     |
| rs3773744                | rs6795127               | 3                      | 53270344                | 53376669                | 106325                  | 0.559027              |
| rs3773745                | rs6795127               | 3                      | 53270424                | 53376669                | 106245                  | 0.559027              |
| rs3773745                | rs6795127               | 3                      | 53270424                | 53376669                | 106245                  | 0.559027              |
| rs393223                 | rs223390                | 4                      | 103605916               | 103748797               | 142881                  | 0.374285              |
| rs393223                 | rs223387                | 4                      | 103605916               | 103749516               | 143600                  | 0.376078              |
| rs393223                 | rs13113099              | 4                      | 103605916               | 103974122               | 368206                  | 0.305892              |
| rs4759413                | rs76514049              | 12                     | 123743436               | 123752637               | 9201                    | 1                     |
| rs4759413                | rs60754073              | 12                     | 123743436               | 123849272               | 105836                  | 1                     |
| rs4759413                | rs28594416              | 12                     | 123743436               | 123849921               | 106485                  | 1                     |
| rs4786494                | rs2270363               | 16                     | 4506232                 | 4526292                 | 20060                   | 0.961428              |
| rs485315                 | rs308699                | 3                      | 161473229               | 161488369               | 15140                   | 0.69311               |
| rs4924832                | rs2974999               | 17                     | 17897739                | 17997547                | 99808                   | 0.86885               |
| rs494791                 | rs11233566              | 11                     | 82996986                | 83048096                | 51110                   | 0.959737              |
| rs5751195                | rs8135801               | 22                     | 42380001                | 42475568                | 95567                   | 0.424978              |
| rs5751195                | rs2269524               | 22                     | 42380001                | 42475703                | 95702                   | 0.428474              |
| rs5751195                | rs1801311               | 22                     | 42380001                | 42486723                | 106722                  | 0.422499              |
| rs5751195                | rs6002621               | 22                     | 42380001                | 42511002                | 131001                  | 0.415547              |
| rs5751195                | rs28633410              | 22                     | 42380001                | 42527471                | 147470                  | 0.373157              |
| rs6002621                | rs28633410              | 22                     | 42511002                | 42527471                | 16469                   | 0.888576              |
| rs60754073               | rs28594416              | 12                     | 123849272               | 123849921               | 649                     | 1                     |
| rs6992091                | rs7014953               | 8                      | 8168222                 | 8168413                 | 191                     | 0.995928              |
| rs6992091                | rs486781                | 8                      | 8168222                 | 8639740                 | 471518                  | 0.339854              |
| rs7014953                | rs486781                | 8                      | 8168413                 | 8639740                 | 471327                  | 0.341782              |
| rs716881                 | rs1352318               | 8                      | 89516441                | 89566903                | 50462                   | 0.923851              |
| rs72748702               | rs12912934              | 15                     | 84915246                | 85114447                | 199201                  | 0.990317              |
| rs76514049               | rs60754073              | 12                     | 123752637               | 123849272               | 96635                   | 1                     |
| rs76514049               | rs28594416              | 12                     | 123752637               | 123849921               | 97284                   | 1                     |
| rs778593                 | rs3822346               | 5                      | 140027216               | 140187322               | 160106                  | 0.740637              |
| rs78532287               | rs61660810              | 17                     | 19912679                | 20170608                | 257929                  | 0.596339              |
| rs78866909               | rs4759413               | 12                     | 123722833               | 123743436               | 20603                   | 1                     |
| rs78866909               | rs76514049              | 12                     | 123722833               | 123752637               | 29804                   | 1                     |

|            |            |    |           |           |        |          |
|------------|------------|----|-----------|-----------|--------|----------|
| rs78866909 | rs60754073 | 12 | 123722833 | 123849272 | 126439 | 1        |
| rs78866909 | rs28594416 | 12 | 123722833 | 123849921 | 127088 | 1        |
| rs796364   | rs281759   | 2  | 200716119 | 200787719 | 71600  | 0.966394 |
| rs8135801  | rs2269524  | 22 | 42475568  | 42475703  | 135    | 0.99557  |
| rs8135801  | rs1801311  | 22 | 42475568  | 42486723  | 11155  | 0.982361 |
| rs8135801  | rs6002621  | 22 | 42475568  | 42511002  | 35434  | 0.973541 |
| rs8135801  | rs28633410 | 22 | 42475568  | 42527471  | 51903  | 0.863791 |
| rs910800   | rs1321     | 22 | 50278642  | 50297435  | 18793  | 0.976108 |
| rs910800   | rs9616378  | 22 | 50278642  | 50311973  | 33331  | 0.875946 |
| rs910800   | rs9616382  | 22 | 50278642  | 50312979  | 34337  | 0.875946 |
| rs910800   | rs7410601  | 22 | 50278642  | 50317187  | 38545  | 0.92912  |
| rs9616378  | rs9616382  | 22 | 50311973  | 50312979  | 1006   | 1        |
| rs9616378  | rs7410601  | 22 | 50311973  | 50317187  | 5214   | 0.934931 |
| rs9616382  | rs7410601  | 22 | 50312979  | 50317187  | 4208   | 0.934931 |

<sup>a</sup>QRSID = Query SNP rsID, <sup>b</sup>RSID = Proxy SNP rsID, <sup>c</sup>CHR = Chromosome, <sup>d</sup>POS1 = Query SNP Position, <sup>e</sup>POS2 = Proxy SNP Position, <sup>f</sup>DIST = Distance between the query SNP and the proxy SNP, <sup>g</sup>R2 represent the degree of LD. R2=1 indicates complete LD. Only SNP pairs with R2>0.3 were shown.

**Supplementary Table 7. Gene ontology analysis revealed that the target genes of regulatory SNPs are enriched in cell adhesion and nervous system development pathways**

| GO category      | Term                                                            | P value  | Adjusted P value <sup>a</sup> |
|------------------|-----------------------------------------------------------------|----------|-------------------------------|
| GOTERM_BP_DIRECT | Homophilic cell adhesion via plasma membrane adhesion molecules | 5.40E-09 | 3.30E-06                      |
| GOTERM_BP_DIRECT | Nervous system development                                      | 1.10E-04 | 3.30E-02                      |

<sup>a</sup>P was adjusted by the Benjamini–Hochberg procedure.

**Supplementary Table 8. Overlapping functional SNPs identified by functional annotation and functional genomics**

---

**SNP**

---

rs11081564

rs117178087

rs2438345

rs2675960

rs7304243

rs9373388

---



**Supplementary Table 9. Overlapping genes identified by Gusev et al. and this study**

---

| <b>Gene Name</b> |
|------------------|
| <i>C2orf47</i>   |
| <i>CORO7</i>     |
| <i>CPNE7</i>     |
| <i>DOC2A</i>     |
| <i>DRG2</i>      |
| <i>EMB</i>       |
| <i>FAM109B</i>   |
| <i>GATAD2A</i>   |
| <i>GLT8D1</i>    |
| <i>MAPK3</i>     |
| <i>MAU2</i>      |
| <i>NAGA</i>      |
| <i>NDUFA2</i>    |
| <i>NEK4</i>      |
| <i>NT5C2</i>     |
| <i>PCDHA2</i>    |
| <i>PRMT7</i>     |
| <i>SEPT10</i>    |
| <i>SLC45A1</i>   |
| <i>TMEM81</i>    |
| <i>TSNAXIP1</i>  |
| <i>ZMAT2</i>     |
| <i>ZSCAN2</i>    |
| <i>C10orf32</i>  |
| <i>CILP2</i>     |
| <i>GNL3</i>      |
| <i>IK</i>        |
| <i>ITIH4</i>     |
| <i>KLC1</i>      |
| <i>NMB</i>       |
| <i>NMRAL1</i>    |
| <i>PPM1M</i>     |
| <i>RERE</i>      |
| <i>WDR73</i>     |
| <i>YPEL3</i>     |
| <i>SDCCAG8</i>   |
| <i>SRA1</i>      |
| <i>ANAPC7</i>    |
| <i>ARL3</i>      |
| <i>CYP2D6</i>    |
| <i>INO80E</i>    |
| <i>PSMA4</i>     |
| <i>CCDC90B</i>   |
| <i>MPP6</i>      |

---

**Supplementary Table 10. Primer sequences used in this study.**

| Primer name                         | Primer sequence                                      |
|-------------------------------------|------------------------------------------------------|
| rs12912934-F-587 <sup>a</sup>       | CCAGAACATTTCTCTATCGATAGGTACCAAGCCACAGCTTAAAAGGAC     |
| rs12912934-R-587 <sup>a</sup>       | GATGCAGATCGCAGATCTCGAGTATGTAGGTGACTTTCAGTTTGG        |
| rs12912934-F-M-587-C>T <sup>b</sup> | GCATAACCACCAACTGGTGTGT                               |
| rs12912934-R-M-587-C>T <sup>b</sup> | GTTATGCAGCCTGGAGCTTCCA                               |
| rs16937-F-560                       | CCAGAACATTTCTCTATCGATAGGTACCTCAGGACATTTTCTTCCAAAG    |
| rs16937-R-560                       | GATGCAGATCGCAGATCTCGAGCGAGCCTTATCAGCACTGAC           |
| rs16937-F-M-560-A>G                 | TGCGTCCTCTGCTGCCCTGTCT                               |
| rs16937-R-M-560-A>G                 | GGACGCAGTGAACACACACCCA                               |
| rs1801311-F-638                     | CCAGAACATTTCTCTATCGATAGGTACCGACCCTTCCCTGAAGCAC       |
| rs1801311-R-638                     | GATGCAGATCGCAGATCTCGAGGATAGCAGGACGCTGAGGGA           |
| rs1801311-F-M-638-G>A               | GAAGTAACTTGGCGGACGCCGCTCCC                           |
| rs1801311-R-M-638-G>A               | GCCAAGTTACTTCTACCGCCAGCACC                           |
| rs2270363-F-469                     | CCAGAACATTTCTCTATCGATAGGTACCATGCAACAGGGAGATCAGATACA  |
| rs2270363-R-469                     | GATGCAGATCGCAGATCTCGAGCAGCCTCCAGTCAGCGTG             |
| rs2270363-F-M-469-A>G               | CATGCTCCGCTTCCCGCCCCG                                |
| rs2270363-R-M-469-A>G               | GAGCATGTGGCTTCCCCAGGT                                |
| rs2535629-F-524                     | CCAGAACATTTCTCTATCGATAGGTACCCAGCTTAGACCAACAGCGTTC    |
| rs2535629-R-524                     | GATGCAGATCGCAGATCTCGAGTGTGCCACTGGTGCTGATTA           |
| rs2535629-F-M-524-G>A               | CCTACAGGATGTGGGACAGCTG                               |
| rs2535629-R-M-524-G>A               | CTGTAGGAAAACAGCCTTGGGC                               |
| rs2711116-F-520                     | CCAGAACATTTCTCTATCGATAGGTACCAACAACATGGATGGATGTCAT    |
| rs2711116-R-520                     | GATGCAGATCGCAGATCTCGAGGCCACTTAATACATGCATCTA          |
| rs2711116-F-M-520-T>C               | ACCCTGCTGGTGGTTACACAGG                               |
| rs2711116-R-M-520-T>C               | GCAGGGTGCAGAAACAGAATAT                               |
| rs6992091-F-635                     | CCAGAACATTTCTCTATCGATAGGTACCAGTCCGAGGATCACTTGAGC     |
| rs6992091-R-635                     | GATGCAGATCGCAGATCTCGAGGGACTCCACTCATTGAAATAGTTC       |
| rs6992091-F-M-635-G>A               | CCCAGCTGCAGGGCACAGTCGG                               |
| rs6992091-R-M-635-G>A               | AGCTGGGGTTGGCAGACACCTC                               |
| rs7012106-F-383                     | CCAGAACATTTCTCTATCGATAGGTACCATCACTCGCCCTGCTCGCCA     |
| rs7012106-R-383                     | GATGCAGATCGCAGATCTCGAGTTGGCGCGGTCCCCTTG              |
| rs7012106-F-M-383-C>G               | CCCCCTGGGCTCTTTTCGGGCCGGCG                           |
| rs7012106-R-M-383-C>G               | AGAGCCCAGGGGAAGGGGCCCGGA                             |
| rs7014953-F-502                     | CCAGAACATTTCTCTATCGATAGGTACC AACGCTGTGATCAAATGTGT    |
| rs7014953-R-502                     | GATGCAGATCGCAGATCTCGAGTGCCTATGGCCGGTTCTC             |
| rs7014953-F-M-502-A>C               | AACAGCCATGACTCATGTTGTACTC                            |
| rs7014953-R-M-502-A>C               | GTCATGGGCTGTTTCAAGTACCCAAC                           |
| rs7709645-F-646                     | CCAGAACATTTCTCTATCGATAGGTACCGGTAACACAGACAAGTAACCAGAT |
| rs7709645-R-646                     | GATGCAGATCGCAGATCTCGAGTCCCGACTTCAGGTGATCC            |
| rs7709645-F-M-646-G>C               | GATGTGCTTTTGCTTTAAATCAGGAT                           |
| rs7709645-R-M-646-G>C               | GCAAAAGCACATCTGTTTATGAGTAA                           |
| rs11655813-F-593                    | CCAGAACATTTCTCTATCGATAGGTACCTGAAGTCTATTAGGGTGAAGCC   |
| rs11655813-R-593                    | GATGCAGATCGCAGATCTCGAGGCCATCTGAGTTTCCACCTT           |
| rs11655813-F-593-C>T                | AGATTAATCTATGTCTGGCCTGGA                             |
| rs11655813-R-593-C>T                | TCCAGGCCAGACATAGAATTAATCT                            |
| rs9908888-F-484                     | CCAGAACATTTCTCTATCGATAGGTACCAGTATAGCAAGAGAACGTCATCG  |

|                      |                                                     |
|----------------------|-----------------------------------------------------|
| rs9908888-R-484      | GATGCAGATCGCAGATCTCGAGGACATAATCACTCCACAATACTGC      |
| rs9908888-F-484-G>C  | CAGTTAAAAAATCTTCTTGCTTCTC                           |
| rs9908888-R-484-G>C  | GAGAAGCAAGAAGATTTTTTAAGT                            |
| rs17821573-F-533     | CCAGAACATTTCTCTATCGATAGGTACCTGCCTGTGGTCCCCTACTAC    |
| rs17821573-R-533     | GATGCAGATCGCAGATCTCGAGGACCTCAAATGATCCACCCAC         |
| rs17821573-F-533-T>C | ACTGAAATAAAACGTAAATGTTGGA                           |
| rs17821573-R-533-T>C | TCCAACATTTACGTTTTIATTTTCAGT                         |
| rs28676999-F-473     | CCAGAACATTTCTCTATCGATAGGTACCGAGTGTCAAAGCCATTGG      |
| rs28676999-R-473     | GATGCAGATCGCAGATCTCGAGCACACCATCTCCCTCAGTC           |
| rs28676999-F-473-C>T | GAAGTGAAGGCTCTTGGGAATGAA                            |
| rs28676999-R-473-C>T | TTCATTCCAAGAGCCTTTCACCTC                            |
| rs301791-F-514       | CCAGAACATTTCTCTATCGATAGGTACCGGTTGAAGCAGCCTGCATAA    |
| rs301791-R-514       | GATGCAGATCGCAGATCTCGAGAAGTAGGCATTTGTGCGTCC          |
| rs301791-F-514-A>T   | CATTTCTACTGTTTCACATCCACA                            |
| rs301791-R-514-A>T   | TGTGGGATGTGAAACAGTAGAAATG                           |
| rs37718-F-451        | CCAGAACATTTCTCTATCGATAGGTACCTAACCATGGCTTAGAAGGC     |
| rs37718-R-451        | GATGCAGATCGCAGATCTCGAGCACCAGACTAGTATGCTTCAGG        |
| rs37718-F-451-C>T    | CTGTCATGTTCAAACCTCTCGGTGTGAGATG                     |
| rs37718-R-451-C>T    | CATCTCACACCGAAGGAGTTTGAACATGACAG                    |
| rs7304782-F-511      | CCAGAACATTTCTCTATCGATAGGTACCCAGGACTTACTTCATTGAAGATG |
| rs7304782-R-511      | GATGCAGATCGCAGATCTCGAGACCTGCGTTCAATGTCTCAAT         |
| rs7304782-F-511-A>G  | TTTCACAGACCAGAATTATGATCCC                           |
| rs7304782-R-511-A>G  | GGGATCATAATTCTGGTCTGTGAAA                           |
| rs4702-F-334         | CCAGAACATTTCTCTATCGATAGGTACCAAAGCACTGACCTGTCATGC    |
| rs4702-R-334         | GATGCAGATCGCAGATCTCGAGGTTGCATAGTCTGCACGTTTA         |
| rs4702-F-334-A>G     | GTTTTGTAAGATACTGGGTTGGTGC                           |
| rs4702-R-334-G>A     | GCACCAACCCAGTATCTTACAAAAC                           |
| rs696520-F-669       | CCAGAACATTTCTCTATCGATAGGTACCCGCAATTAGGATGAGCTGCT    |
| rs696520-R-669       | GATGCAGATCGCAGATCTCGAGCGAGAGAGAGCTGAGCTAAGG         |
| rs696520-F-669-C>T   | GGATAAGTCCAATAGTAGGACACAA                           |
| rs696520-R-669-C>T   | TTGTGTCCTACTATTGGACTTATCC                           |
| rs7752421-F-552      | CCAGAACATTTCTCTATCGATAGGTACCTTACCAACCTGACTGGGACA    |
| rs7752421-R-552      | GATGCAGATCGCAGATCTCGAGGTCATCTGAGAGGACCTCACAT        |
| rs7752421-F-552-A>T  | GAGAAGACTGAATGTGAAGATGCAC                           |
| rs7752421-R-552-A>T  | GTGCATCTTCACATTCAGTCTTCTC                           |

<sup>a</sup>This pair of primers were used to amplify the DNA fragments containing the tested SNP. <sup>b</sup>This pair of primers were used for PCR-mediated site mutation (i.e., to obtain the sequence containing the alternative allele of the tested SNP).

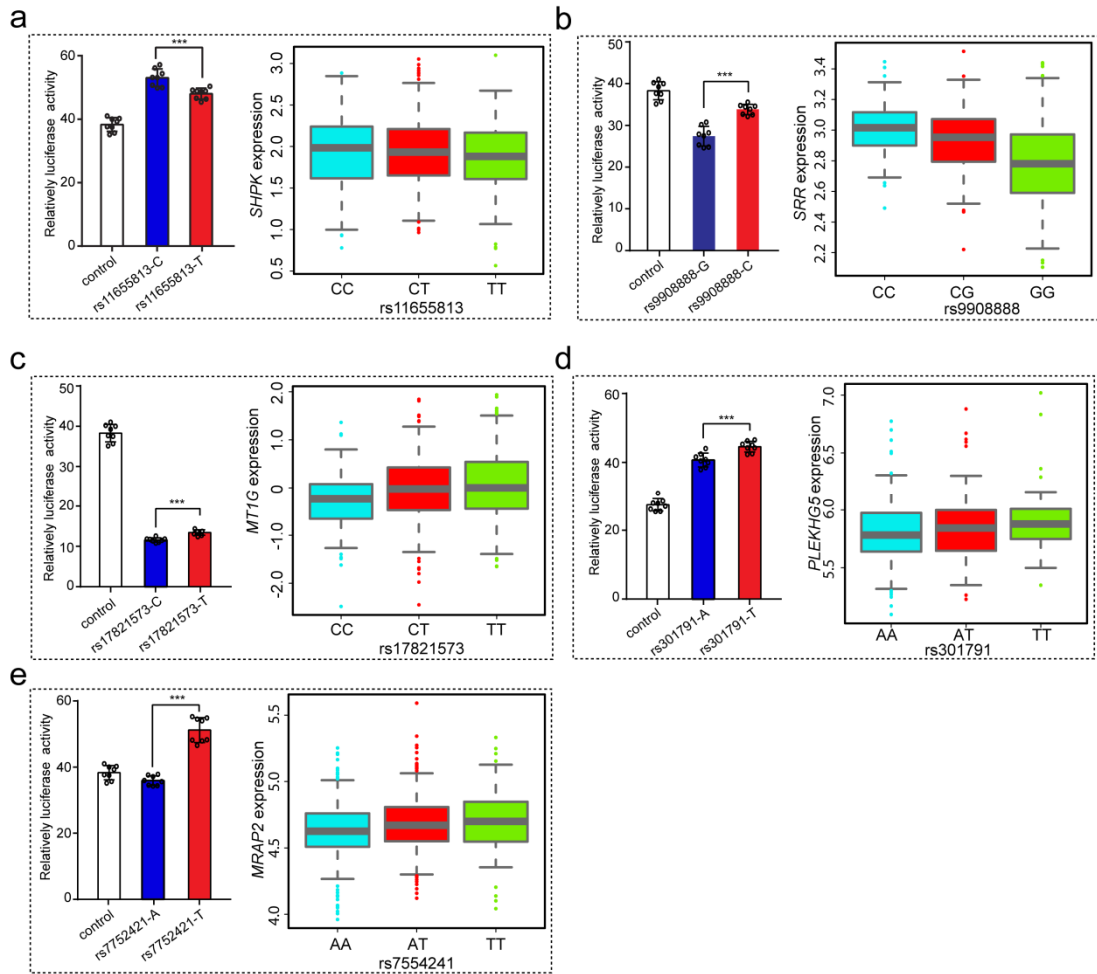

**Supplementary Figure 1. Comparison of the allelic effects on luciferase activity observed in reporter gene assays with the estimated eQTL effects of the corresponding alleles in CMC dataset.** Seven SNPs (rs11655813, rs9908888, rs17821573, rs301791, rs37718, rs7304782, rs7752421) in Fig.2b showed significant allelic effects in reporter gene assays. Among these 7 significant SNPs, 5 SNPs (rs11655813, rs9908888, rs17821573, rs301791 and rs7752421) were significantly associated ( $FDR < 0.01$ ) with gene expression in CMC dataset. For these 5 significant eQTL SNPs, we found that the allelic effects on gene expression observed in reporter gene assays are consistent with the estimated eQTL effects of the corresponding alleles in CMC dataset. Of note, in some cases, the same SNP is associated with the expression of several genes. Only the gene whose expression in different genotypic individuals was consistent with the allelic effects observed in reporter gene assays was showed here. The left part of each panel is reporter gene assay result and the right part is eQTL result.

## Distribution of random SNPs in genomic regions

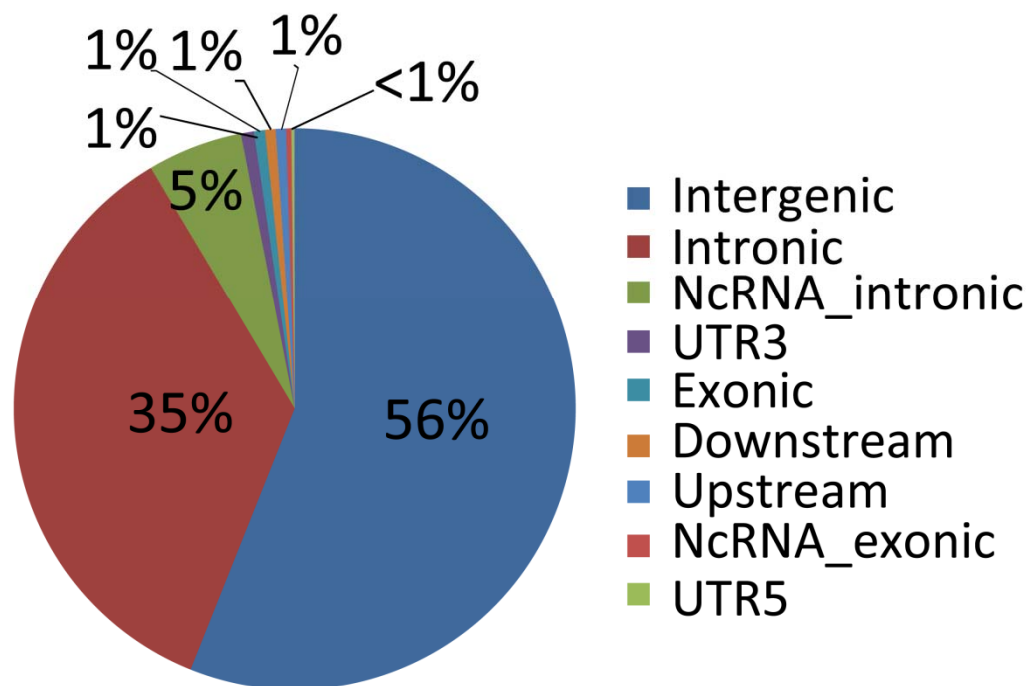

**Supplementary Figure 2. Distribution of random SNPs in the human genome.** Most of the random SNPs were located in intergenic and intronic regions (56% random SNP were located in intergenic regions and 35% random SNPs were located in intronic regions).

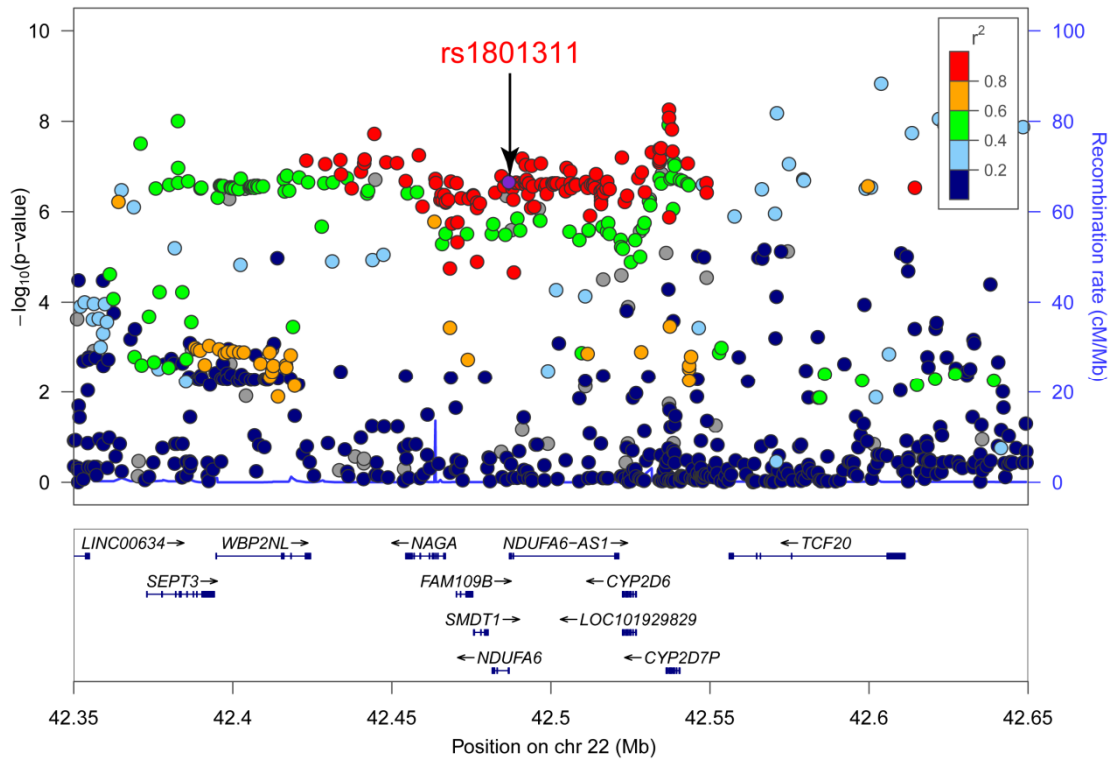

**Supplementary Figure 3. SNP rs1801311 is located in 22q13.2, a schizophrenia risk locus identified by genome-wide association study.** Due to linkage disequilibrium, this locus harbors multiple SNPs that show similar association significance with schizophrenia. The TF binding-disrupting SNP (i.e., rs1801311) is highlighted by black arrow.

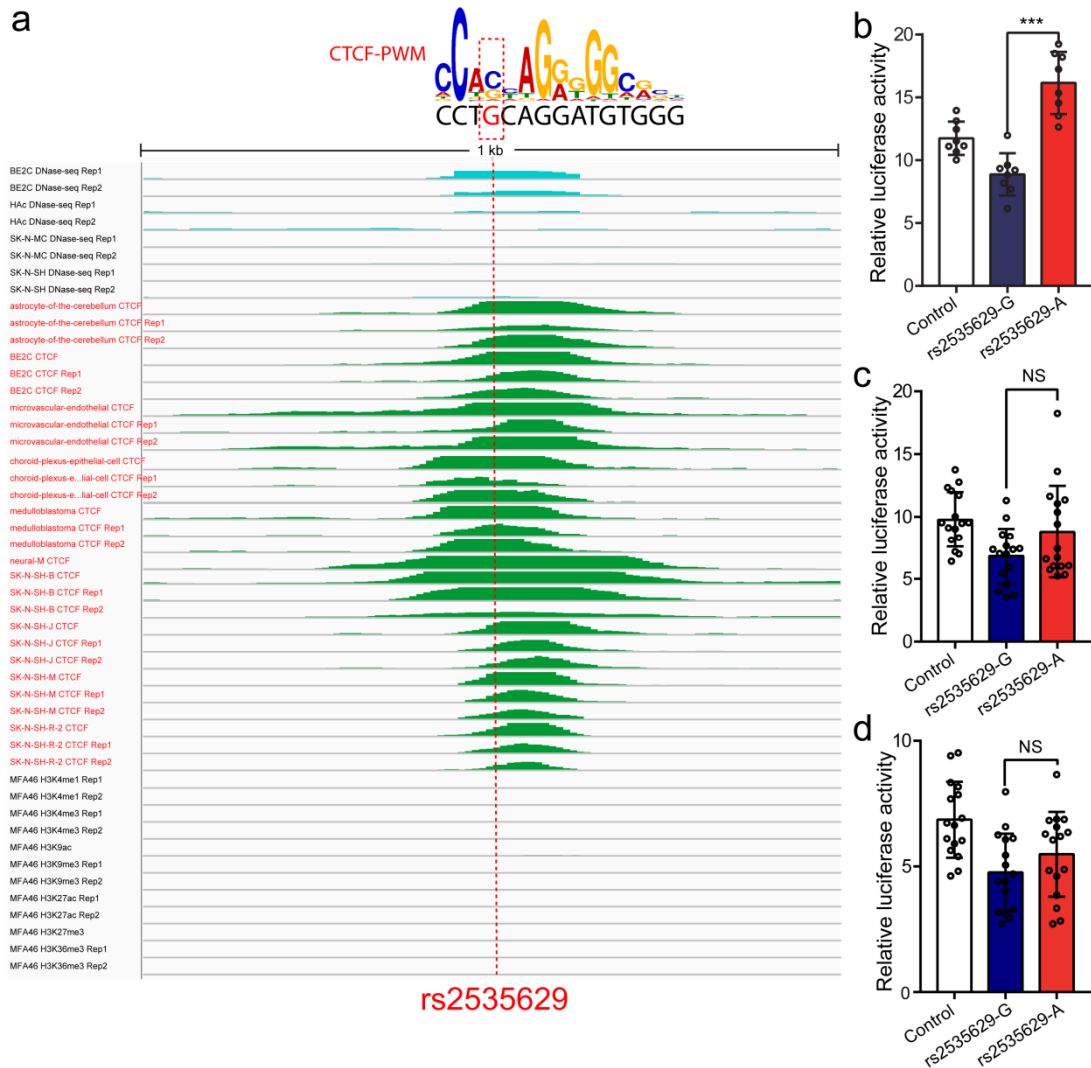

**Supplementary Figure 4. SNP rs2535629 disputes an occupied CTCF binding site.** (a) SNP rs2535629 is located in the CTCF binding motif and disrupts occupied CTCF binding site in human brain tissues or neuronal cell lines. PWMs of CTCF and genomic sequence containing SNP rs2535629 were shown (rs2535629 was marked with red dotted box). Genomic region (1 kb) surrounding SNP rs2535629 was shown with DNase-Seq signal (light blue) and ChIP-Seq signal (green). (b-d) Reporter gene assays showed that the allelic differences at the rs2535629 influenced the luciferase activity significantly in HEK293 cells (b), but not in SK-N-SH (c) and SH-SY5Y cells (d). Data represent mean±SD. n=8 for each group in (b) (HEK293 cells). n=16 for each group in (c) (SK-N-SH cells) and (d) (SH-SY5Y cells). NS, not significant. \*\*\* $P < 0.001$ , two-tailed Student's *t* test. Source data are provided as a Source Data file.

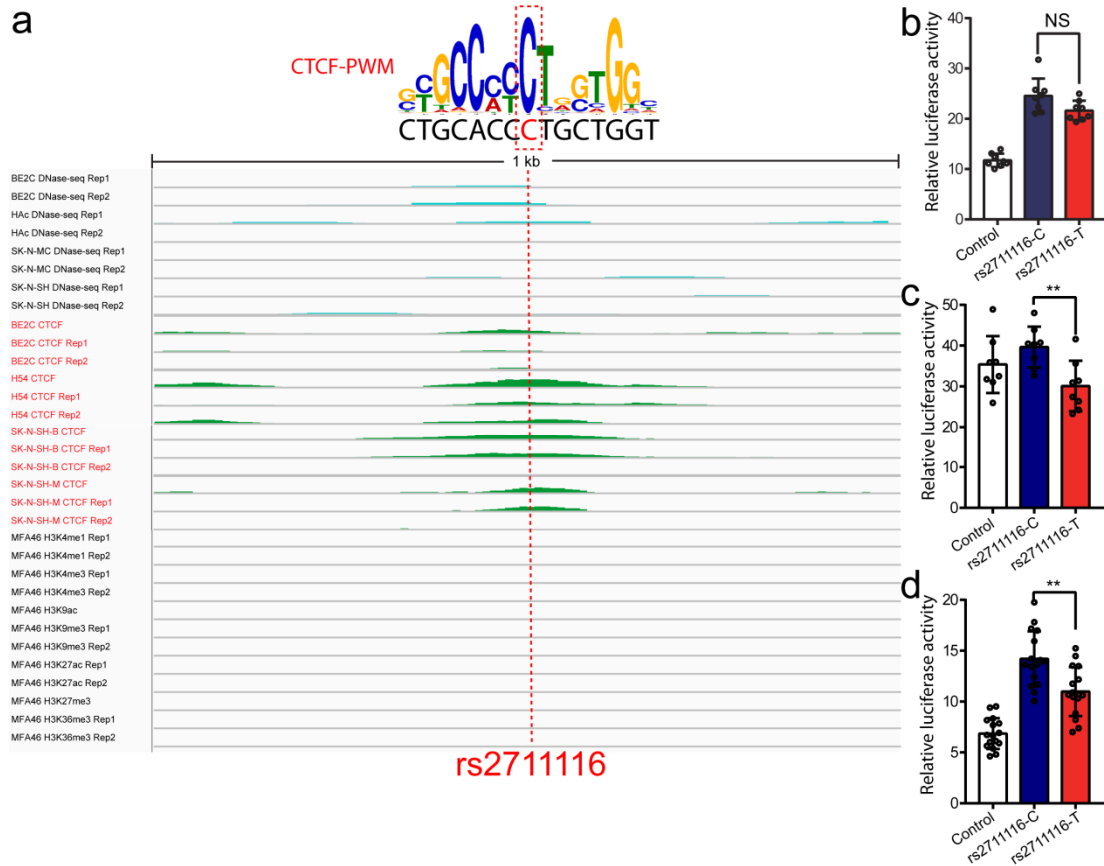

**Supplementary Figure 5. SNP rs2711116 disputes an occupied CTCF binding site. (a)** SNP rs2711116 is located in the CTCF binding motif and disrupts occupied CTCF binding site in human brain tissues or neuronal cell lines. PWMs of CTCF and genomic sequence containing SNP rs2711116 were shown (rs2711116 was marked with red dotted box). Genomic region (1 kb) surrounding SNP rs2711116 was shown with DNase-Seq signal (light blue) and ChIP-Seq signal (green). **(b-d)** Reporter gene assays showed that the allelic differences at the rs2711116 influenced the luciferase activity significantly in SK-N-SH cells **(c)** and SH-SY5Y cells **(d)**, but not in HEK293 cells **(b)**. Data represent mean $\pm$ SD.  $n=8$  for each group in **(b)** (HEK293 cells) and **(c)** (SK-N-SH cells).  $n=16$  for each group in **(d)** (SH-SY5Y cells). NS, not significant. \*\* $P<0.01$ , two-tailed Student's  $t$  test. Source data are provided as a Source Data file.



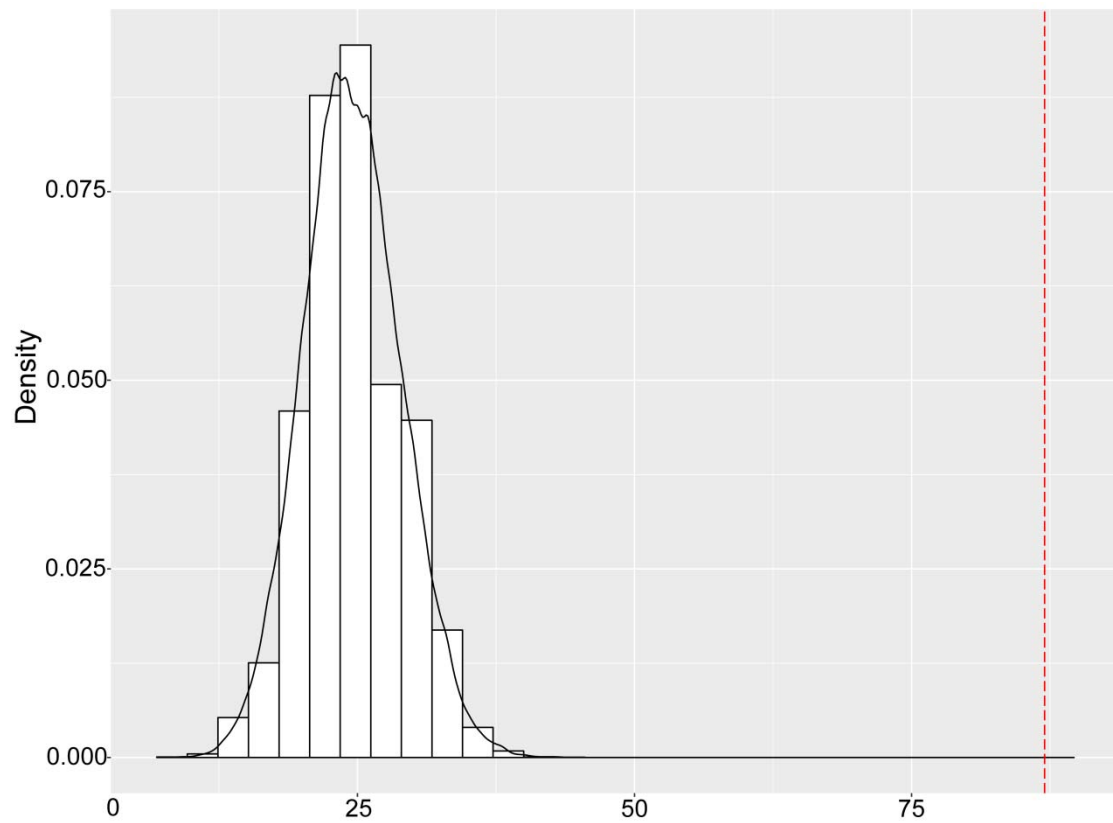

**Supplementary Figure 6. The identified regulatory SNPs showed significant association with gene expression ( $Z=14.23$ ,  $P=3.09\times 10^{-46}$ ) compared with random SNPs.** The histogram reflects the distribution of the number of random SNPs that showed significant association with gene expression in CMC dataset. The red dashed line indicated the number of observed significant SNPs ( $n=87$ ) in CMC dataset.

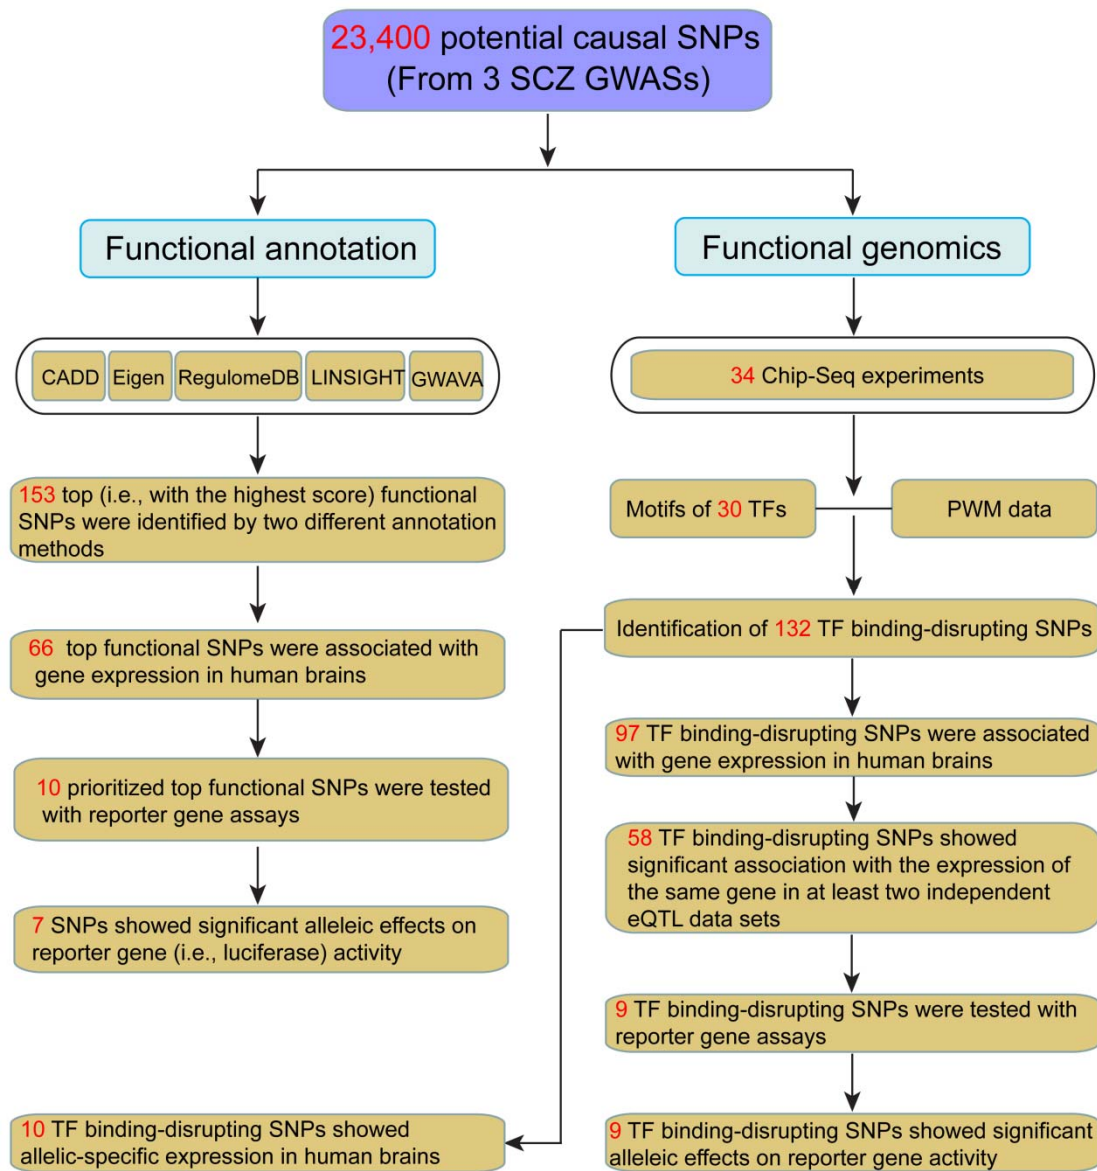

**Supplementary Figure 7. Summary of the functional SNPs identified at each stage.** Functional annotation approaches prioritized 153 top functional SNPs. Among the 153 top functional SNPs, 66 SNPs were associated with gene expression in human brain tissues and 7 SNPs exhibited allelic effects on reporter gene activity. Functional genomics identified 132 TF binding-disrupting SNPs. Among these 132 TF binding-disrupting SNPs, 97 were associated with gene expression in human brain tissues and 58 showed significant association with the same gene in at least two independent brain eQTL datasets. We tested 9 TF binding-disrupting SNPs with reporter gene assays. Of note, all of the tested SNPs showed significant allelic effects on reporter gene (i.e., luciferase) activity. In addition, 10 TF binding-disrupting SNPs showed allelic-specific expression in human brain tissues.

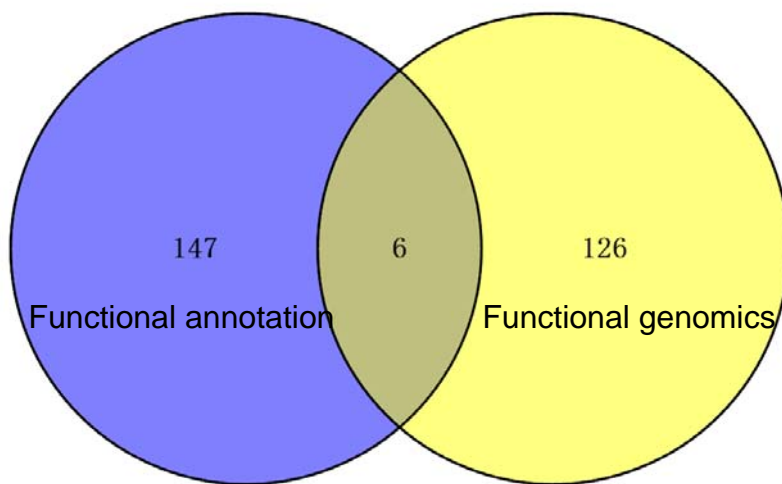

**Supplementary Figure 8. Venn diagram shows the overlapping SNPs identified by functional annotation and functional genomics approaches.** The 6 overlapping SNPs are rs11081564, rs117178087, rs2438345, rs2675960, rs7304243 and rs9373388.

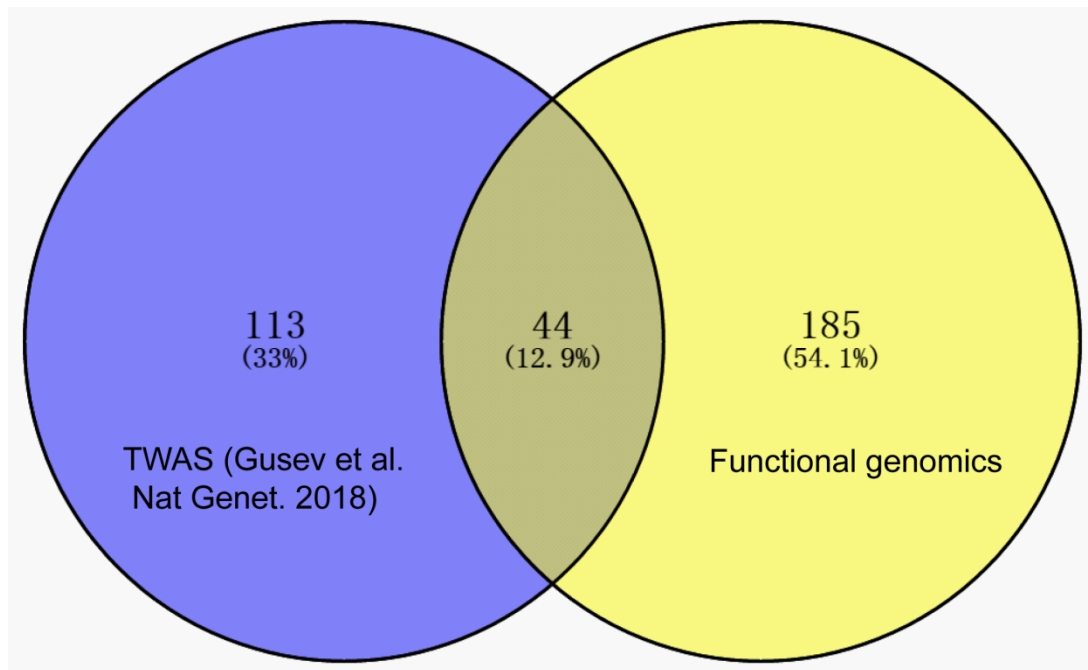

**Supplementary Figure 9. Venn diagram shows the overlapping genes identified by Gusev *et al.* (Gusev et al., Nat Genet. 2018) and functional genomics. Of note, 44 overlapping genes were identified by Gusev *et al.* and this study.**

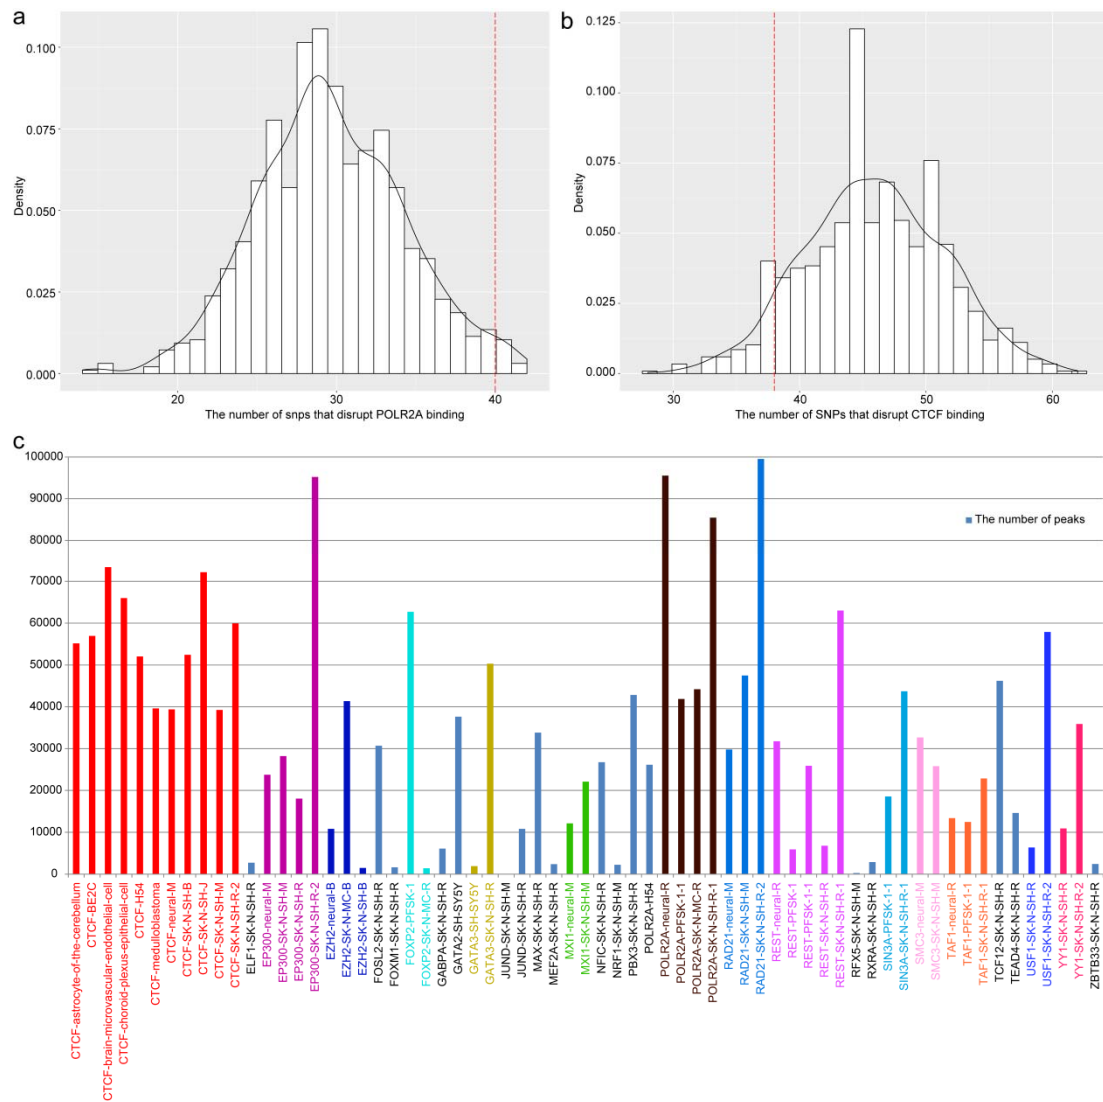

**Supplementary Figure 10. The number of random SNPs that disrupt POLR2A and CTCF binding.** (a) The distribution of random SNPs that disrupted POLR2A binding. The number of POLR2A binding-disrupting SNPs observed in this study were significantly higher than random SNPs ( $P=0.013$ , 1,000 simulations). (b) The distribution of random SNPs that disrupted CTCF binding. The number of CTCF binding-disrupting SNPs observed in this study were not significantly different from random SNPs ( $P>0.05$ , 1,000 simulations). (c) The number of motifs (ChIP-Seq peaks) of each TF included in this study. The detail information about the ChIP-Seq peaks from different neuronal cells or brain tissues can be found in Supplementary Table 6.

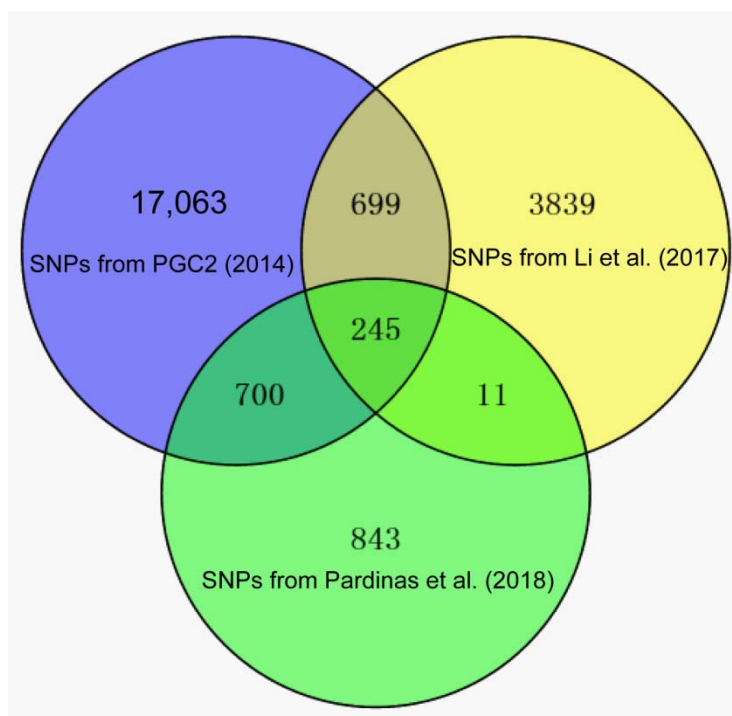

**Supplementary Figure 11. Venn diagram shows the overlapping SNPs of the three schizophrenia GWAS.**

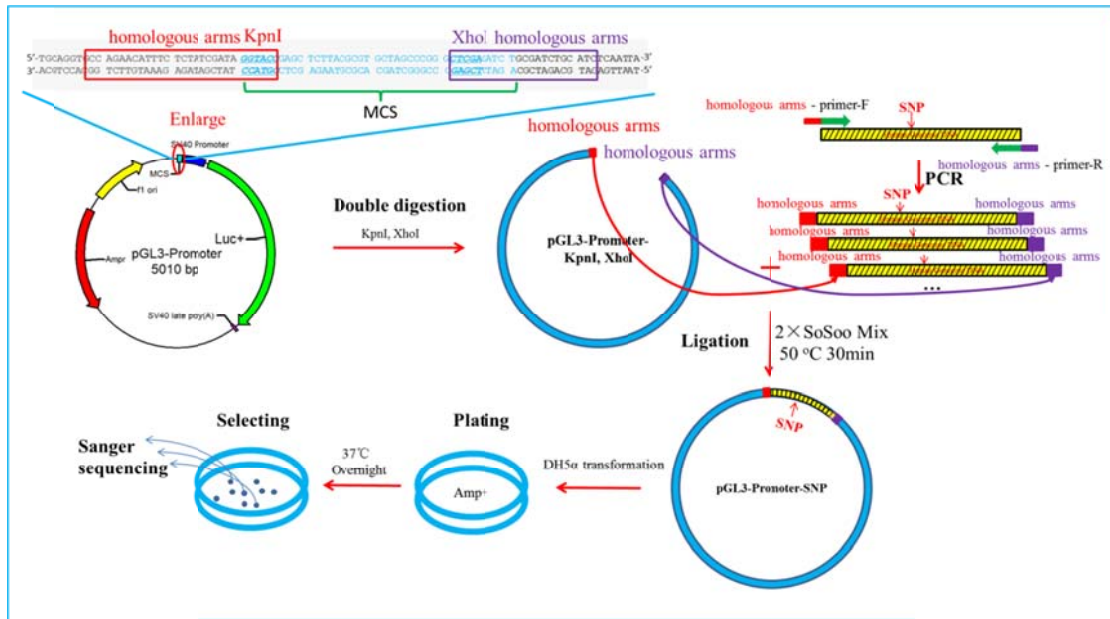

**Supplementary Figure 12. Construction of reporter gene vector.** PGL3-promoter vectors were digested by KpnI and XhoI, and the enzyme-digested products were purified with DNA Purification Kit. The DNA fragments (the test SNP was located in the fragments) were amplified using PCR primers tagged with homologous arms (the sequence of homologous arms are identical with the pGL3-promoter vector DNA sequence). The PCR products were purified and ligated to the PGL3-promoter vector using 2xSoSoo Mix. The recombinant plasmids were used to transform DH5 $\alpha$  cells, and single colony were picked for Sanger sequencing.

## References

1. Owen, M.J., O'Donovan, M.C., Thapar, A. & Craddock, N. Neurodevelopmental hypothesis of schizophrenia. *Br J Psychiatry* **198**, 173-175 (2011).
2. Fatemi, S.H. & Folsom, T.D. The neurodevelopmental hypothesis of schizophrenia, revisited. *Schizophr Bull* **35**, 528-548 (2009).
3. Rapoport, J.L., Giedd, J.N. & Gogtay, N. Neurodevelopmental model of schizophrenia: update 2012. *Mol Psychiatry* **17**, 1228-1238 (2012).
4. Mao, Y. et al. Disrupted in schizophrenia 1 regulates neuronal progenitor proliferation via modulation of GSK3beta/beta-catenin signaling. *Cell* **136**, 1017-1031 (2009).
5. Yang, C.P. et al. Comprehensive integrative analyses identify GLT8D1 and CSNK2B as schizophrenia risk genes. *Nat Commun* **9**, 838 (2018).
6. Walsh, T. et al. Rare structural variants disrupt multiple genes in neurodevelopmental pathways in schizophrenia. *Science* **320**, 539-543 (2008).
7. O'Dushlaine, C. et al. Molecular pathways involved in neuronal cell adhesion and membrane scaffolding contribute to schizophrenia and bipolar disorder susceptibility. *Mol Psychiatry* **16**, 286-292 (2011).
8. Zhang, Z. et al. Evidence for Association of Cell Adhesion Molecules Pathway and NLGN1 Polymorphisms with Schizophrenia in Chinese Han Population. *PLoS One* **10**, e0144719 (2015).
9. Won, H. et al. Chromosome conformation elucidates regulatory relationships in developing human brain. *Nature* **538**, 523-527 (2016).
10. Gilman, S.R. et al. Diverse types of genetic variation converge on functional gene networks involved in schizophrenia. *Nat Neurosci* **15**, 1723-1728 (2012).
11. Schizophrenia Working Group of the Psychiatric Genomics Consortium\*. Biological insights from 108 schizophrenia-associated genetic loci. *Nature* **511**, 421-427 (2014).
12. Pers, T.H. et al. Comprehensive analysis of schizophrenia-associated loci highlights ion channel pathways and biologically plausible candidate causal genes. *Hum Mol Genet* **25**, 1247-1254 (2016).
13. Xu, B. et al. De novo gene mutations highlight patterns of genetic and neural complexity in schizophrenia. *Nat Genet* **44**, 1365-1369 (2012).
14. Gulsuner, S. et al. Spatial and temporal mapping of de novo mutations in schizophrenia to a fetal prefrontal cortical network. *Cell* **154**, 518-29 (2013).
15. Phillips, J.E. & Corces, V.G. CTCF: master weaver of the genome. *Cell* **137**, 1194-1211 (2009).
16. Hou, C., Zhao, H., Tanimoto, K. & Dean, A. CTCF-dependent enhancer-blocking by alternative chromatin loop formation. *Proc Natl Acad Sci U S A* **105**, 20398-20403 (2008).
17. Lee, B.K. & Iyer, V.R. Genome-wide studies of CCCTC-binding factor (CTCF) and cohesin provide insight into chromatin structure and regulation. *J Biol Chem* **287**, 30906-30913 (2012).
18. Juraeva, D. et al. Integrated pathway-based approach identifies association between genomic regions at CTCF and CACNB2 and schizophrenia. *PLoS Genet* **10**, e1004345 (2014).
19. Baruch, K. et al. Association between golli-MBP and schizophrenia in the Jewish Ashkenazi population: are regulatory regions involved? *Int J Neuropsychopharmacol* **12**, 885-94 (2009).
20. Pardinas, A.F. et al. Common schizophrenia alleles are enriched in mutation-intolerant genes



- and in regions under strong background selection. *Nat Genet* **50**, 381-389 (2018).
21. Li, Z. et al. Genome-wide association analysis identifies 30 new susceptibility loci for schizophrenia. *Nat Genet* **49**, 1576-1583 (2017).
